# Supplementary material for: Driver mutations in histone H3.3 and chromatin remodelling genes in paediatric glioblastoma
Source: Springer Nature journal article supplement (doi:10.1038/nature10833), 2012-01-27
Supplement: 41586_2012_BFnature10833_MOESM505_ESM.pdf [file 41586_2012_BFnature10833_MOESM505_ESM.pdf]

**Supplementary Table 1: Clinical information for 48 whole exome sequencing samples**

| Sample ID | Age | Gender | tumor location               | Death | OS (months) | Recurrence | PFS (months) | GEP-Affy | SNP 2.5M Illumina |
|-----------|-----|--------|------------------------------|-------|-------------|------------|--------------|----------|-------------------|
| PGBM1     | 13  | F      | thalamic                     | YES   | 13          | YES        | 5            | NO       | YES               |
| PGBM2     | 5   | M      | left temporo-parietal        | YES   | 6           | YES        | 4            | YES      | YES               |
| PGBM3     | 11  | M      | intraventricular (I-II)      | YES   | NA          | YES        | 7            | NO       | YES               |
| PGBM4     | 10  | M      | thalamic+lateral ventricular | YES   | 7           | NA         | NA           | YES      | YES               |
| PGBM5     | 9   | F      | NA                           | YES   | 36          | YES        | 18           | NO       | YES               |
| PGBM6     | 11  | M      | thalamic                     | YES   | 5           | NA         | NA           | YES      | YES               |
| PGBM8     | 6   | F      | NA                           | YES   | 12          | YES        | 7            | YES      | NO                |
| PGBM9     | 8   | F      | NA                           | YES   | 7           | NO         | 7            | YES      | NO                |
| PGBM10    | 11  | M      | NA                           | YES   | 32          | YES        | 25           | NO       | NO                |
| PGBM11    | 13  | M      | NA                           | YES   | 18          | NO         | 18           | YES      | YES               |
| PGBM12    | 14  | M      | left temporal lobe           | NO    | 27          | NO         | 27           | NO       | YES               |
| PGBM13    | 14  | M      | occipital lobe               | YES   | 8           | NA         | NA           | NO       | YES               |
| PGBM14    | 15  | M      | right temporo-parietal       | NO    | 17          | NO         | 17           | YES      | YES               |
| PGBM15    | 13  | M      | NA                           | YES   | 13          | YES        | 9            | YES      | NO                |
| PGBM16    | 20  | F      | parietal occipital           | NA    | NA          | NA         | NA           | YES      | NO                |
| PGBM17    | 17  | M      | left frontal and axial       | NA    | NA          | NA         | NA           | YES      | NO                |
| PGBM18    | 14  | M      | temporal lobe                | NO    | 27          | NO         | 27           | NO       | YES               |
| PGBM19    | 20  | M      | NA                           | NA    | NA          | 1          | NA           | NO       | YES               |
| PGBM20    | 11  | M      | NA                           | NA    | NA          | NA         | NA           | NO       | YES               |
| PGBM21    | 14  | F      | temporal lobe                | YES   | 34          | YES        | 22           | NO       | YES               |
| PGBM22    | NA  | NA     | NA                           | NA    | NA          | NA         | NA           | YES      | NO                |
| PGBM23    | 13  | M      | NA                           | NO    | 14          | NA         | NA           | NO       | YES               |
| PGBM24    | 14  | M      | NA                           | YES   | 14          | YES        | 5            | YES      | YES               |
| PGBM25    | 12  | M      | temporal lobe                | YES   | 17          | YES        | 15           | NO       | YES               |
| PGBM26    | 14  | M      | NA                           | YES   | 5           | YES        | 5            | YES      | YES               |
| PGBM27    | 9   | F      | NA                           | YES   | 10          | YES        | 9            | YES      | YES               |
| PGBM28    | 14  | M      | left temporo-parietal        | NA    | NA          | NA         | NA           | NO       | NO                |
| PGBM29    | 15  | M      | NA                           | NA    | NA          | NA         | NA           | YES      | NO                |
| PGBM30    | 6   | M      | thalamic                     | NA    | NA          | NA         | NA           | YES      | NO                |
| PGBM31    | 7   | F      | NA                           | YES   | 12          | YES        | 8            | NO       | YES               |
| PGBM32    | 4   | M      | NA                           | YES   | 11          | YES        | 10           | NO       | YES               |
| PGBM33    | 12  | M      | NA                           | NO    | 8           | NA         | NA           | NO       | NO                |
| PGBM34    | 12  | F      | NA                           | YES   | 8           | NA         | NA           | NO       | YES               |
| PGBM35    | 7.3 | M      | parietal lobe                | YES   | NA          | YES        | 7            | YES      | YES               |
| PGBM36    | 7   | M      | NA                           | YES   | 25          | YES        | 15           | NO       | YES               |
| PGBM37    | 7   | M      | left cerebellar              | NA    | NA          | NA         | NA           | YES      | YES               |
| PGBM38    | 11  | M      | NA                           | YES   | NA          | YES        | 7            | NO       | NO                |
| PGBM39    | 12  | F      | parietal lobe                | NO    | 24          | NA         | NA           | YES      | YES               |
| PGBM40    | 14  | F      | thalamic                     | NO    | 16          | NA         | NA           | YES      | YES               |
| PGBM41    | 7   | F      | left thalamic                | YES   | 10          | YES        | 9            | YES      | YES               |
| PGBM42    | 2   | F      | NA                           | YES   | 8           | YES        | 4            | YES      | YES               |
| PGBM43    | 16  | F      | NA                           | YES   | 12          | YES        | 8            | YES      | YES               |
| PGBM44    | 6   | F      | NA                           | YES   | 37          | YES        | 23           | NO       | NO                |
| PGBM45    | 9   | M      | right frontal                | YES   | 12          | YES        | 10           | YES      | YES               |
| PGBM46    | 14  | M      | NA                           | NO    | 55          | NO         | 55           | YES      | NO                |
| PGBM47    | 14  | F      | NA                           | YES   | 14          | YES        | 12           | YES      | NO                |
| PGBM48    | 2   | M      | NA                           | NO    | 117         | NO         | 117          | NO       | NO                |
| PGBM49    | 5.4 | M      | frontal lobe                 | NA    | NA          | NA         | NA           | YES      | NO                |

Supplementary Table 2: Summary of sequence analysis of pediatric GBMs

† Using CCDS version 2011/04/22

| Sample       | Bases sequenced (after quality filtering) | Median # of reads per base in CCDS† | Median # of reads per                 |                                       |
|--------------|-------------------------------------------|-------------------------------------|---------------------------------------|---------------------------------------|
|              |                                           |                                     | base in CCDS after duplicate removal† | CCDS bases with at least 10 reads (%) |
| PGBM1        | 13,505,091,987                            | 94                                  | 85                                    | 92.4                                  |
| PGBM2        | 17,119,601,726                            | 109                                 | 70                                    | 91.3                                  |
| PGBM3        | 17,792,909,823                            | 111                                 | 72                                    | 91.0                                  |
| PGBM4        | 13,363,577,977                            | 64                                  | 52                                    | 90.5                                  |
| PGBM4-blood  | 14,066,040,787                            | 74                                  | 59                                    | 91.9                                  |
| PGBM5        | 14,504,723,839                            | 75                                  | 43                                    | 88.9                                  |
| PGBM6        | 12,287,727,427                            | 59                                  | 46                                    | 88.1                                  |
| PGBM6-blood  | 13,999,868,369                            | 67                                  | 53                                    | 88.9                                  |
| PGBM8        | 12,897,621,735                            | 109                                 | 88                                    | 93.5                                  |
| PGBM9        | 12,045,904,509                            | 104                                 | 85                                    | 93.1                                  |
| PGBM10       | 11,619,534,201                            | 100                                 | 82                                    | 93.1                                  |
| PGBM11       | 16,935,710,296                            | 112                                 | 104                                   | 93.9                                  |
| PGBM12       | 18,612,864,498                            | 95                                  | 56                                    | 91.1                                  |
| PGBM13       | 10,904,833,155                            | 51                                  | 41                                    | 87.3                                  |
| PGBM13-blood | 13,552,900,813                            | 73                                  | 58                                    | 91.9                                  |
| PGBM14       | 15,701,377,658                            | 86                                  | 53                                    | 91.0                                  |
| PGBM14-blood | 10,213,821,624                            | 50                                  | 30                                    | 83.4                                  |
| PGBM15       | 10,582,247,277                            | 86                                  | 67                                    | 92.1                                  |
| PGBM16       | 11,521,709,389                            | 106                                 | 80                                    | 92.3                                  |
| PGBM17       | 12,870,074,056                            | 68                                  | 57                                    | 91.9                                  |
| PGBM18       | 16,596,170,697                            | 113                                 | 104                                   | 94.3                                  |
| PGBM19       | 12,687,545,184                            | 65                                  | 53                                    | 91.3                                  |
| PGBM20       | 13,400,490,858                            | 69                                  | 56                                    | 91.5                                  |
| PGBM21       | 16,068,676,400                            | 102                                 | 95                                    | 93.8                                  |
| PGBM22       | 11,061,729,809                            | 93                                  | 74                                    | 92.8                                  |
| PGBM23       | 14,088,721,409                            | 68                                  | 44                                    | 89.1                                  |
| PGBM24       | 10,190,203,445                            | 49                                  | 41                                    | 87.9                                  |
| PGBM25       | 12,094,215,054                            | 62                                  | 52                                    | 90.5                                  |
| PGBM26       | 19,718,043,045                            | 123                                 | 81                                    | 91.7                                  |
| PGBM27       | 17,672,965,295                            | 98                                  | 62                                    | 90.5                                  |
| PGBM28       | 13,235,175,617                            | 88                                  | 65                                    | 92.0                                  |
| PGBM29       | 4,376,261,391                             | 38                                  | 22                                    | 83.9                                  |
| PGBM30       | 11,331,964,823                            | 100                                 | 78                                    | 92.5                                  |
| PGBM31       | 9,457,007,712                             | 48                                  | 29                                    | 85.4                                  |
| PGBM32       | 15,996,029,641                            | 101                                 | 94                                    | 94.1                                  |
| PGBM33       | 10,601,377,271                            | 89                                  | 72                                    | 92.7                                  |
| PGBM34       | 9,753,010,363                             | 46                                  | 27                                    | 83.7                                  |
| PGBM35       | 16,828,099,833                            | 115                                 | 68                                    | 91.3                                  |
| PGBM36       | 12,731,008,997                            | 68                                  | 38                                    | 88.2                                  |
| PGBM37       | 20,336,444,728                            | 134                                 | 78                                    | 92.9                                  |
| PGBM38       | 9,929,368,120                             | 51                                  | 29                                    | 85.5                                  |
| PGBM39       | 13,628,886,633                            | 65                                  | 52                                    | 89.7                                  |
| PGBM40-blood | 13,251,854,585                            | 71                                  | 59                                    | 91.4                                  |
| PGBM40       | 11,824,281,050                            | 58                                  | 46                                    | 87.2                                  |
| PGBM41-blood | 14,095,936,522                            | 68                                  | 53                                    | 88.5                                  |
| PGBM41       | 17,799,081,592                            | 120                                 | 78                                    | 91.3                                  |
| PGBM42       | 12,032,711,376                            | 64                                  | 54                                    | 89.9                                  |
| PGBM43       | 14,904,682,891                            | 88                                  | 80                                    | 92.4                                  |
| PGBM44       | 14,651,870,734                            | 102                                 | 94                                    | 93.6                                  |
| PGBM45       | 17,328,188,664                            | 90                                  | 60                                    | 91.7                                  |
| PGBM46       | 10,137,136,155                            | 82                                  | 69                                    | 92.7                                  |
| PGBM47       | 10,003,457,301                            | 80                                  | 66                                    | 92.3                                  |
| PGBM48       | 12,519,238,552                            | 111                                 | 91                                    | 93.4                                  |
| PGBM49       | 11,864,031,610                            | 103                                 | 81                                    | 92.5                                  |

**Supplementary Table 3: Candidate somatic mutations in the 6 tumor samples with matched germline DNA**

Tumor variants were considered to be somatic when matched normal had more than  $\geq 10$  reads and 0 variant reads

| Sample | # Somatic mutations       |                           |                              |
|--------|---------------------------|---------------------------|------------------------------|
|        | Normal has $\geq 0$ reads | Normal has $\geq 5$ reads | Normal has $\geq 10$ reads** |
| PGBM6  | 20                        | 17                        | 13                           |
| PGBM13 | 32                        | 32                        | 31                           |
| PGBM4  | 14                        | 12                        | 12                           |
| PGBM39 | 19                        | 19                        | 16                           |
| PGBM14 | 29                        | 18                        | 14                           |
| PGBM40 | 10                        | 6                         | 3                            |

\*\*Variants shown in table below

| Sample | Gene      | Transcript accession | Nucleotide variant | Amino acid change   | Mutation type          |
|--------|-----------|----------------------|--------------------|---------------------|------------------------|
| PGBM6  | AHNAK     | NM_001620.1          | c.10565C>T         | p.(Pro3522Leu)      | nonsynonymous SNV      |
| PGBM39 | AHRR      | NM_020731.4          | c.496G>A           | p.(Asp166Asn)       | nonsynonymous SNV      |
| PGBM14 | ATRX      | NM_000489.3          | c.5269G>T          | p.(Glu1757*)        | stopgain SNV           |
| PGBM4  | ATRX      | NM_000489.3          | c.3168delG         | p.(Lys1057Argfs*61) | frameshift deletion    |
| PGBM13 | ATRX      | NM_000489.3          | c.5215C>T          | p.(Arg1739*)        | stopgain SNV           |
| PGBM6  | ATRX      | NM_000489.3          | c.5399T>C          | p.(Met1800Thr)      | nonsynonymous SNV      |
| PGBM13 | BMPER     | NM_133468.3          | c.1476G>T          | p.(Lys492Asn)       | nonsynonymous SNV      |
| PGBM39 | BRAF      | NM_004333.4          | c.1799T>A          | p.(Val600Glu)       | nonsynonymous SNV      |
| PGBM13 | C13orf40  | NM_001146197.1       | c.3703G>C          | p.(Glu1235Gln)      | nonsynonymous SNV      |
| PGBM13 | C20orf195 | NM_024059.2          | c.16G>T            | p.(Ala6Ser)         | nonsynonymous SNV      |
| PGBM13 | C8orf73   | NM_001100878.1       | c.1933G>A          | p.(Asp645Asn)       | nonsynonymous SNV      |
| PGBM13 | CD5L      | NM_005894.2          | c.568C>T           | p.(Arg190Cys)       | nonsynonymous SNV      |
| PGBM13 | CHMP7     | NM_152272.3          | c.1012G>T          | p.(Asp338Tyr)       | nonsynonymous SNV      |
| PGBM13 | CMYA5     | NM_153610.3          | c.2674C>T          | p.(Arg892*)         | stopgain SNV           |
| PGBM39 | COL19A1   | NM_001858.4          | c.1969A>T          | p.(Thr657Ser)       | nonsynonymous SNV      |
| PGBM13 | CR2       | NM_001006658.2       | c.1559G>A          | p.(Arg520His)       | nonsynonymous SNV      |
| PGBM14 | CSMD3     | NM_198123.1          | c.1352C>A          | p.(Ala451Asp)       | nonsynonymous SNV      |
| PGBM39 | DSPP      | NM_014208.3          | c.3447A>C          | p.(Glu1149Asp)      | nonsynonymous SNV      |
| PGBM6  | DUSP6     | NM_001946.2          | c.848G>A           | p.(Arg283Gln)       | nonsynonymous SNV      |
| PGBM40 | EIF4E1B   | NM_001099408.1       | c.140G>A           | p.(Gly47Glu)        | nonsynonymous SNV      |
| PGBM14 | FBXW7     | NM_033632.2          | c.566_567del       | p.(Lys189Serfs*66)  | frameshift deletion    |
| PGBM4  | FCGBP     | NM_003890.2          | c.14369G>A         | p.(Gly4790Asp)      | nonsynonymous SNV      |
| PGBM6  | FGFR1     | NM_023110.2          | c.1966A>G          | p.(Lys656Glu)       | nonsynonymous SNV      |
| PGBM39 | GNAS      | NM_001077490.1       | c.644C>T           | p.(Ser215Phe)       | nonsynonymous SNV      |
| PGBM39 | GPR172A   | NM_024531.3          | c.1052G>A          | p.(Gly351Asp)       | nonsynonymous SNV      |
| PGBM4  | GRIPAP1   | NM_020137.3          | c.2414A>G          | p.(Lys805Arg)       | nonsynonymous SNV      |
| PGBM4  | GYS2      | NM_021957.3          | c.1889C>T          | p.(Thr630Met)       | nonsynonymous SNV      |
| PGBM4  | H3F3A     | NM_002107.4          | c.83A>T            | p.(Lys28Met)        | nonsynonymous SNV      |
| PGBM6  | H3F3A     | NM_002107.4          | c.83A>T            | p.(Lys28Met)        | nonsynonymous SNV      |
| PGBM13 | H3F3A     | NM_002107.4          | c.103G>A           | p.(Gly35Arg)        | nonsynonymous SNV      |
| PGBM14 | H3F3A     | NM_002107.4          | c.103G>A           | p.(Gly35Arg)        | nonsynonymous SNV      |
| PGBM13 | HMX3      | NM_001105574.1       | c.622G>T           | p.(Gly208Cys)       | nonsynonymous SNV      |
| PGBM13 | HOOK1     | NM_015888.4          | c.206A>G           | p.(Asp69Gly)        | nonsynonymous SNV      |
| PGBM14 | KCNS2     | NM_020697.2          | c.395_397del       | p.(Glu133del)       | nonframeshift deletion |
| PGBM13 | KIAA1217  | NM_019590.3          | c.3988G>A          | p.(Val1330Met)      | nonsynonymous SNV      |
| PGBM4  | KIAA1826  | NM_032424.1          | c.904C>T           | p.(Arg302*)         | stopgain SNV           |
| PGBM39 | KRT27     | NM_181537.3          | c.167G>A           | p.(Gly56Glu)        | nonsynonymous SNV      |
| PGBM40 | LOXL4     | NM_032211.6          | c.247G>T           | p.(Ala83Ser)        | nonsynonymous SNV      |
| PGBM6  | LPHN2     | NM_012302.2          | c.3287C>A          | p.(Pro1096Gln)      | nonsynonymous SNV      |
| PGBM39 | LRP1      | NM_002332.2          | c.2218C>T          | p.(Pro740Ser)       | nonsynonymous SNV      |
| PGBM13 | LSP1      | NM_002339.2          | c.970G>A           | p.(Gly324Arg)       | nonsynonymous SNV      |
| PGBM39 | LUM       | NM_002345.3          | c.547C>T           | p.(Leu183Phe)       | nonsynonymous SNV      |
| PGBM4  | LYPD5     | NM_001031749.2       | c.695G>A           | p.(Arg232Gln)       | nonsynonymous SNV      |
| PGBM14 | MARK1     | NM_018650.3          | c.1259G>A          | p.(Arg420Gln)       | nonsynonymous SNV      |
| PGBM14 | MFGE8     | NM_005928.2          | c.118_120del       | p.(Glu40del)        | nonframeshift deletion |
| PGBM40 | MTF1      | NM_005955.2          | c.1532C>A          | p.(Ala511Glu)       | nonsynonymous SNV      |
| PGBM13 | MTUS2     | NM_001033602.2       | c.1472C>T          | p.(Thr491Met)       | nonsynonymous SNV      |
| PGBM13 | MYO5C     | NM_018728.3          | c.4626C>A          | p.(Asp1542Glu)      | nonsynonymous SNV      |
| PGBM39 | NCAM2     | NM_004540.3          | c.2230A>G          | p.(Ser744Gly)       | nonsynonymous SNV      |
| PGBM4  | NDST2     | NM_003635.3          | c.329G>A           | p.(Arg110His)       | nonsynonymous SNV      |

|        |                 |                |                |                     |                        |
|--------|-----------------|----------------|----------------|---------------------|------------------------|
| PGBM6  | <i>NF1</i>      | NM_001042492.2 | c.3735_3744del | p.(Phe1247Glyfs*16) | frameshift deletion    |
| PGBM6  | <i>NF1</i>      | NM_001042492.2 | c.6746_6748del | p.(Val2251del)      | nonframeshift deletion |
| PGBM13 | <i>NLRP2</i>    | NM_017852.3    | c.1379C>T      | p.(Ala460Val)       | nonsynonymous SNV      |
| PGBM6  | <i>OR1E1</i>    | NM_003553.2    | c.437C>T       | p.(Ala146Val)       | nonsynonymous SNV      |
| PGBM13 | <i>OR4C6</i>    | NM_001004704.1 | c.662G>T       | p.(Cys221Phe)       | nonsynonymous SNV      |
| PGBM6  | <i>OR51A7</i>   | NM_001004749.1 | c.136C>T       | p.(Leu46Phe)        | nonsynonymous SNV      |
| PGBM4  | <i>PCDHB14</i>  | NM_018934.2    | c.1966G>A      | p.(Ala656Thr)       | nonsynonymous SNV      |
| PGBM14 | <i>PHF3</i>     | NM_015153.2    | c.310_312del   | p.(Glu106del)       | nonframeshift deletion |
| PGBM4  | <i>PIK3C2A</i>  | NM_002645.2    | c.458C>T       | p.(Ala153Val)       | nonsynonymous SNV      |
| PGBM13 | <i>PRIC285</i>  | NM_001037335.2 | c.4842C>A      | p.(Asp1614Glu)      | nonsynonymous SNV      |
| PGBM6  | <i>PTEN</i>     | NM_000314.4    | c.634-2A>C     | splicing            | splicing               |
| PGBM13 | <i>PTGDR</i>    | NM_000953.2    | c.146G>T       | p.(Cys49Phe)        | nonsynonymous SNV      |
| PGBM39 | <i>RAB23</i>    | NM_016277.3    | c.551C>T       | p.(Thr184Met)       | nonsynonymous SNV      |
| PGBM13 | <i>RANBP2</i>   | NM_006267.4    | c.7106G>A      | p.(Arg2369His)      | nonsynonymous SNV      |
| PGBM13 | <i>RERE</i>     | NM_001042681.1 | c.8C>T         | p.(Ala3Val)         | nonsynonymous SNV      |
| PGBM13 | <i>RGMA</i>     | NM_020211.2    | c.1248G>T      | p.(Arg416Ser)       | nonsynonymous SNV      |
| PGBM13 | <i>RHOBTB1</i>  | NM_014836.4    | c.1502C>T      | p.(Pro501Leu)       | nonsynonymous SNV      |
| PGBM13 | <i>RYR2</i>     | NM_001035.2    | c.13130C>T     | p.(Ser4377Leu)      | nonsynonymous SNV      |
| PGBM39 | <i>SDHA</i>     | NM_004168.2    | c.772G>C       | p.(Gly258Arg)       | nonsynonymous SNV      |
| PGBM14 | <i>SESN3</i>    | NM_144665.2    | c.649_650del   | p.(Asp217Serfs*19)  | frameshift deletion    |
| PGBM13 | <i>SFXN4</i>    | NM_213649.1    | c.971C>A       | p.(Ser324Tyr)       | nonsynonymous SNV      |
| PGBM14 | <i>TKT</i>      | NM_001135055.2 | c.1644C>T      | p.(Trp548Cys)       | nonsynonymous SNV      |
| PGBM6  | <i>TMC2</i>     | NM_080751.2    | c.2173C>A      | p.(Pro725Thr)       | nonsynonymous SNV      |
| PGBM13 | <i>TMEM132D</i> | NM_133448.2    | c.89G>T        | p.(Gly30Val)        | nonsynonymous SNV      |
| PGBM6  | <i>TNP2</i>     | NM_005425.4    | c.62C>T        | p.(Pro21Leu)        | nonsynonymous SNV      |
| PGBM14 | <i>TP53</i>     | NM_000546.4    | c.817C>T       | p.(Arg273Cys)       | nonsynonymous SNV      |
| PGBM14 | <i>TP53</i>     | NM_000546.4    | c.743G>A       | p.(Arg248Gln)       | nonsynonymous SNV      |
| PGBM4  | <i>TP53</i>     | NM_000546.4    | c.785delG      | p.(Gly262Valfs*83)  | frameshift deletion    |
| PGBM13 | <i>TP53</i>     | NM_000546.4    | c.767delC      | p.(Thr256Asnfs*89)  | frameshift deletion    |
| PGBM39 | <i>TRIM28</i>   | NM_005762.2    | c.499G>A       | p.(Val167Met)       | nonsynonymous SNV      |
| PGBM13 | <i>TTN</i>      | NM_133378.4    | c.24060C>A     | p.(Phe8020Leu)      | nonsynonymous SNV      |
| PGBM4  | <i>UBE2I</i>    | NM_194261.2    | c.28G>A        | p.(Ala10Thr)        | nonsynonymous SNV      |
| PGBM13 | <i>UBE3A</i>    | NM_000462.3    | c.1619T>G      | p.(Leu540Arg)       | nonsynonymous SNV      |
| PGBM14 | <i>URB2</i>     | NM_014777.2    | c.156G>T       | p.(Leu52Phe)        | nonsynonymous SNV      |
| PGBM39 | <i>USP26</i>    | NM_031907.1    | c.2138T>A      | p.(Ile713Asn)       | nonsynonymous SNV      |
| PGBM13 | <i>ZCCHC4</i>   | NM_024936.2    | c.100G>T       | p.(Ala34Ser)        | nonsynonymous SNV      |
| PGBM14 | <i>ZCCHC5</i>   | NM_152694.2    | c.1085A>T      | p.(Gln362Leu)       | nonsynonymous SNV      |
| PGBM39 | <i>ZNF622</i>   | NM_033414.2    | c.525G>T       | p.(Glu175Asp)       | nonsynonymous SNV      |
| PGBM39 | <i>ZNF622</i>   | NM_033414.2    | c.327G>C       | p.(Met109Ile)       | nonsynonymous SNV      |

**Supplementary Table 4: Summary of somatic mutations in pediatric glioblastoma and 5 cancer types from Parsons et al.**

|                                                  | Pediatric GBM | Adult GBM   | Medulloblastoma | Pancreas    | Colorectal  | Breast      |
|--------------------------------------------------|---------------|-------------|-----------------|-------------|-------------|-------------|
| Number of samples analyzed                       | 6             | 21          | 22              | 24          | 11          | 11          |
| Number of mutated genes                          | 80            | 685         | 218             | 1007        | 769         | 1026        |
| Number of nonsilent mutations                    | 87            | 748         | 183             | 1163        | 849         | 1112        |
| Missense                                         | 71 (81.6%)    | 622 (83.2%) | 130 (71.0%)     | 974 (83.7%) | 722 (85%)   | 909 (81.7%) |
| Nonsense                                         | 4 (4.6%)      | 43 (5.7%)   | 18 (9.8%)       | 60 (5.2%)   | 48 (5.7%)   | 64 (5.8%)   |
| Insertion                                        | 0             | 3 (0.4%)    | 5 (2.7%)        | 4 (0.3%)    | 4 (0.5%)    | 5 (0.4%)    |
| Deletion                                         | 10 (11.5%)    | 46 (6.1%)   | 14 (7.7%)       | 43 (3.7%)   | 27 (3.2%)   | 78 (7.0%)   |
| Duplication                                      | 0             | 7 (0.9%)    | 7 (3.8%)        | 31 (2.7%)   | 18 (2.1%)   | 3 (0.3%)    |
| Splice site or UTR                               | 2 (2.3%)      | 27 (3.6%)   | 9 (4.9%)        | 51 (4.4%)   | 30 (3.5%)   | 53 (4.8%)   |
| Average number of nonsilent mutations per sample | 15            | 36          | 8               | 48          | 77          | 101         |
| Observed/expected number of nonsense alterations |               | 1           | 2.48            | 1.18        | 1.25        | 1.37        |
| Total number of substitutions                    | 77            | 937         | 199             | 1486        | 893         | 1157        |
| Substitutions at C:G base pairs                  |               |             |                 |             |             |             |
| C:G to T:A**                                     | 40 (50.6%)    | 601 (64.1%) | 109 (54.8%)     | 798 (53.8%) | 534 (59.8%) | 422 (36.5%) |
| C:G to G:C**                                     | 3 (3.8%)      | 67 (7.2%)   | 12 (6.0%)       | 142 (9.6%)  | 61 (6.8%)   | 325 (28.1%) |
| C:G to A:T**                                     | 21 (26.6%)    | 114 (12.1%) | 41 (20.6%)      | 246 (16.6%) | 130 (14.6%) | 175 (15.1%) |
| Substitutions at T:A base pairs                  |               |             |                 |             |             |             |
| T:A to C:G**                                     | 5 (6.3%)      | 87 (9.3%)   | 19 (9.5%)       | 142 (9.6%)  | 69 (7.7%)   | 102 (8.8%)  |
| T:A to G:C**                                     | 3 (3.8%)      | 24 (2.6%)   | 14 (7.0%)       | 79 (5.3%)   | 59 (6.6%)   | 57 (4.9%)   |
| T:A to A:T**                                     | 7 (8.9%)      | 44 (4.7%)   | 4 (2.0%)        | 77 (5.2%)   | 40 (4.5%)   | 76 (6.6%)   |
| Substitutions at specific dinucleotides          |               |             |                 |             |             |             |
| 5'-CpG-3'***                                     | no data       | 404 (43.1%) | 85 (42.7%)      | 563 (37.9%) | 427 (47.8%) | 195 (16.9%) |
| 5'-TpC-3'***                                     | no data       | 102 (10.9%) | 14 (7.0%)       | 218 (14.7%) | 99 (11.1%)  | 395 (34.1%) |

**Supplementary Table 5: Mutations in selected genes H3F3A, ATRX, DAXX, IDH1, PDGFRA, EGFR, TP53**

| Sample | Gene          | Transcript accession | Nucleotide variant  | Amino acid change             | Mutation type       |
|--------|---------------|----------------------|---------------------|-------------------------------|---------------------|
| PGBM1  | <i>H3F3A</i>  | NM_002107.4          | c.83A>T             | p.(Lys27Met)                  | Missense            |
| PGBM2  | <i>H3F3A</i>  | NM_002107.4          | c.83A>T             | p.(Lys27Met)                  | Missense            |
| PGBM3  | <i>H3F3A</i>  | NM_002107.4          | c.83A>T             | p.(Lys27Met)                  | Missense            |
| PGBM5  | <i>H3F3A</i>  | NM_002107.4          | c.83A>T             | p.(Lys27Met)                  | Missense            |
| PGBM6  | <i>H3F3A</i>  | NM_002107.4          | c.83A>T             | p.(Lys27Met)                  | Missense            |
| PGBM4  | <i>H3F3A</i>  | NM_002107.4          | c.83A>T             | p.(Lys27Met)                  | Missense            |
| PGBM8  | <i>H3F3A</i>  | NM_002107.4          | c.83A>T             | p.(Lys27Met)                  | Missense            |
| PGBM9  | <i>H3F3A</i>  | NM_002107.4          | c.83A>T             | p.(Lys27Met)                  | Missense            |
| PGBM10 | <i>H3F3A</i>  | NM_002107.4          | c.83A>T             | p.(Lys27Met)                  | Missense            |
| PGBM11 | <i>H3F3A</i>  | NM_002107.4          | c.103G>A            | p.(Gly34Arg)                  | Missense            |
| PGBM14 | <i>H3F3A</i>  | NM_002107.4          | c.103G>A            | p.(Gly34Arg)                  | Missense            |
| PGBM12 | <i>H3F3A</i>  | NM_002107.4          | c.103G>A            | p.(Gly34Arg)                  | Missense            |
| PGBM13 | <i>H3F3A</i>  | NM_002107.4          | c.103G>A            | p.(Gly34Arg)                  | Missense            |
| PGBM15 | <i>H3F3A</i>  | NM_002107.4          | c.103G>A            | p.(Gly34Arg)                  | Missense            |
| PGBM16 | <i>H3F3A</i>  | NM_002107.4          | c.104G>T            | p.(Gly34Val)                  | Missense            |
| PGBM1  | <i>ATRX</i>   | NM_000489.3          | c.3364delT          | p.(Cys1122Valfs*8)            | Frameshift indel    |
| PGBM4  | <i>ATRX</i>   | NM_000489.3          | c.3168delG          | p.(Lys1057Argfs*61)           | Frameshift indel    |
| PGBM6  | <i>ATRX</i>   | NM_000489.3          | c.5399T>C           | p.(Met1800Thr)                | Missense            |
| PGBM11 | <i>ATRX</i>   | NM_000489.3          | c.4179_4182del      | p.(Ser1394Asnfs*95)           | Frameshift indel    |
| PGBM12 | <i>ATRX</i>   | NM_000489.3          | c.5178_5179insA     | p.(Glu1727Argfs*7)            | Frameshift indel    |
| PGBM13 | <i>ATRX</i>   | NM_000489.3          | c.5215C>T           | p.(Arg1739*)                  | Nonsense            |
| PGBM14 | <i>ATRX</i>   | NM_000489.3          | c.5269G>T           | p.(Glu1757*)                  | Nonsense            |
| PGBM15 | <i>ATRX</i>   | NM_000489.3          | c.6761A>G           | p.(His2254Arg)                | Missense            |
| PGBM16 | <i>ATRX</i>   | NM_000489.3          | c.6331C>T           | p.(Arg2111*)                  | Nonsense            |
| PGBM17 | <i>ATRX</i>   | NM_000489.3          | c.4766G>T           | p.(Gly1589Val)                | Missense            |
| PGBM18 | <i>ATRX</i>   | NM_000489.3          | c.4276C>T           | p.(Arg1426*)                  | Nonsense            |
| PGBM19 | <i>ATRX</i>   | NM_000489.3          | c.4745_4746insA     | p.(Lys1584Glufs*17)           | Frameshift indel    |
| PGBM20 | <i>ATRX</i>   | NM_000489.3          | c.7327A>G           | p.(Asn2443Asp)                | Missense            |
| PGBM22 | <i>ATRX</i>   | NM_000489.3          | c.4745_4746insA     | p.(Lys1584Glufs*17)           | Frameshift indel    |
| PGBM22 | <i>ATRX</i>   | NM_000489.3          | c.3904delA          | p.(Arg1302Glufs*44)           | Frameshift indel    |
| PGBM22 | <i>ATRX</i>   | NM_000489.3          | c.6406G>A           | p.(Asp2136Asn)                | Missense            |
| PGBM19 | <i>DAXX</i>   | NM_001350.4          | c.1885_1886insC     | p.(Cys629Serfs*29)            | Frameshift indel    |
| PGBM21 | <i>DAXX</i>   | NM_001350.4          | c.712C>T            | p.(Arg238*)                   | Nonsense            |
| PGBM17 | <i>IDH1</i>   | NM_005896.2          | c.395G>A            | p.(Arg132His)                 | Missense            |
| PGBM18 | <i>IDH1</i>   | NM_005896.2          | c.395G>A            | p.(Arg132His)                 | Missense            |
| PGBM23 | <i>IDH1</i>   | NM_005896.2          | c.395G>A            | p.(Arg132His)                 | Missense            |
| PGBM29 | <i>IDH1</i>   | NM_005896.2          | c.395G>A            | p.(Arg132His)                 | Missense            |
| PGBM2  | <i>PDGFRA</i> | NM_006206.4          | c.[1154A>T;1155G>A] | p.(Lys385Ile)                 | Missense            |
| PGBM16 | <i>PDGFRA</i> | NM_006206.4          | c.1154A>T           | p.(Lys385Met)                 | Missense            |
| PGBM34 | <i>PDGFRA</i> | NM_006206.4          | c.2525_2527del      | p.(Asp842_Ile843delinsVal)    | Nonframeshift indel |
| PGBM12 | <i>PDGFRA</i> | NM_006206.4          | c.2545T>G           | p.(Tyr849Asp)                 | Missense            |
| PGBM22 | <i>EGFR</i>   | NM_005228.3          | c.2165C>T           | p.(Ala722Val)                 | Missense            |
| PGBM27 | <i>EGFR</i>   | NM_005228.3          | c.2950G>A           | p.(Asp984Asn)                 | Missense            |
| PGBM1  | <i>TP53</i>   | NM_000546.4          | c.916C>T            | p.(Arg306*)                   | Nonsense            |
| PGBM1  | <i>TP53</i>   | NM_000546.4          | c.455_459del        | p.(Pro152Argfs*27)            | Frameshift indel    |
| PGBM2  | <i>TP53</i>   | NM_000546.4          | c.637C>T            | p.(Arg213*)                   | Nonsense            |
| PGBM3  | <i>TP53</i>   | NM_000546.4          | c.393_395del        | p.(Asn131del)                 | Nonframeshift indel |
| PGBM4  | <i>TP53</i>   | NM_000546.4          | c.785delG           | p.(Gly262Valfs*83)            | Frameshift indel    |
| PGBM8  | <i>TP53</i>   | NM_000546.4          | c.817C>T            | p.(Arg273Cys)                 | Missense            |
| PGBM9  | <i>TP53</i>   | NM_000546.4          | c.818G>C            | p.(Arg273Pro)                 | Missense            |
| PGBM11 | <i>TP53</i>   | NM_000546.4          | c.488A>G            | p.(Tyr163Cys)                 | Missense            |
| PGBM12 | <i>TP53</i>   | NM_000546.4          | c.1024C>T           | p.(Arg342*)                   | Nonsense            |
| PGBM12 | <i>TP53</i>   | NM_000546.4          | c.524G>A            | p.(Arg175His)                 | Missense            |
| PGBM13 | <i>TP53</i>   | NM_000546.4          | c.767delC           | p.(Thr256Asnfs*89)            | Frameshift indel    |
| PGBM14 | <i>TP53</i>   | NM_000546.4          | c.817C>T            | p.(Arg273Cys)                 | Missense            |
| PGBM14 | <i>TP53</i>   | NM_000546.4          | c.743G>A            | p.(Arg248Gln)                 | Missense            |
| PGBM15 | <i>TP53</i>   | NM_000546.4          | c.548_549insGCCCCCA | p.(Asp184_Asp393delinsProPro) | Nonframeshift indel |
| PGBM16 | <i>TP53</i>   | NM_000546.4          | c.1024C>T           | p.(Arg342*)                   | Nonsense            |
| PGBM17 | <i>TP53</i>   | NM_000546.4          | c.659A>G            | p.(Tyr220Cys)                 | Missense            |

|        |             |             |                 |                     |                     |
|--------|-------------|-------------|-----------------|---------------------|---------------------|
| PGBM18 | <i>TP53</i> | NM_000546.4 | c.586C>T        | p.(Arg196*)         | Nonsense            |
| PGBM18 | <i>TP53</i> | NM_000546.4 | c.817C>T        | p.(Arg273Cys)       | Missense            |
| PGBM19 | <i>TP53</i> | NM_000546.4 | c.800G>A        | p.(Arg267Gln)       | Missense            |
| PGBM19 | <i>TP53</i> | NM_000546.4 | c.689C>T        | p.(Thr230Ile)       | Missense            |
| PGBM20 | <i>TP53</i> | NM_000546.4 | c.742C>T        | p.(Arg248Trp)       | Missense            |
| PGBM21 | <i>TP53</i> | NM_000546.4 | c.799C>T        | p.(Arg267Trp)       | Missense            |
| PGBM21 | <i>TP53</i> | NM_000546.4 | c.455C>T        | p.(Pro152Leu)       | Missense            |
| PGBM22 | <i>TP53</i> | NM_000546.4 | c.1009C>T       | p.(Arg337Cys)       | Missense            |
| PGBM22 | <i>TP53</i> | NM_000546.4 | c.524G>A        | p.(Arg175His)       | Missense            |
| PGBM23 | <i>TP53</i> | NM_000546.4 | c.761T>G        | p.(Ile254Ser)       | Missense            |
| PGBM24 | <i>TP53</i> | NM_000546.4 | c.586C>T        | p.(Arg196*)         | Nonsense            |
| PGBM25 | <i>TP53</i> | NM_000546.4 | c.1024C>T       | p.(Arg342*)         | Nonsense            |
| PGBM26 | <i>TP53</i> | NM_000546.4 | c.524G>A        | p.(Arg175His)       | Missense            |
| PGBM27 | <i>TP53</i> | NM_000546.4 | c.751A>C        | p.(Ile251Leu)       | Missense            |
| PGBM28 | <i>TP53</i> | NM_000546.4 | c.818G>A        | p.(Arg273His)       | Missense            |
| PGBM29 | <i>TP53</i> | NM_000546.4 | c.29T>G         | p.(Val10Gly)        | Missense            |
| PGBM30 | <i>TP53</i> | NM_000546.4 | c.733G>A        | p.(Gly245Ser)       | Missense            |
| PGBM5  | <i>NF1</i>  | NM_000267.3 | c.6787_6790del  | p.(Tyr2264Thrfs*5)  | Frameshift indel    |
| PGBM6  | <i>NF1</i>  | NM_000267.3 | c.3735_3744del  | p.(Phe1247Glyfs*16) | Frameshift indel    |
| PGBM6  | <i>NF1</i>  | NM_000267.3 | c.6683_6685del  | p.(Val2230del)      | Nonframeshift indel |
| PGBM10 | <i>NF1</i>  | NM_000267.3 | c.2970delA      | p.(Met991*)         | Nonsense            |
| PGBM18 | <i>NF1</i>  | NM_000267.3 | c.1866T>A       | p.(Cys622*)         | Nonsense            |
| PGBM18 | <i>NF1</i>  | NM_000267.3 | c.4466delT      | p.(Leu1489Hisfs*64) | Frameshift indel    |
| PGBM19 | <i>NF1</i>  | NM_000267.3 | c.1318C>T       | p.(Arg440*)         | Nonsense            |
| PGBM21 | <i>NF1</i>  | NM_000267.3 | c.5839C>T       | p.(Arg1947*)        | Nonsense            |
| PGBM22 | <i>NF1</i>  | NM_000267.3 | c.7846C>T       | p.(Arg2616*)        | Nonsense            |
| PGBM22 | <i>NF1</i>  | NM_000267.3 | c.2659G>A       | p.(Ala887Thr)       | Missense            |
| PGBM22 | <i>NF1</i>  | NM_000267.3 | c.1381C>T       | p.(Arg461*)         | Nonsense            |
| PGBM25 | <i>NF1</i>  | NM_000267.3 | c.4575delG      | p.(Gly1526Valfs*27) | Frameshift indel    |
| PGBM26 | <i>NF1</i>  | NM_000267.3 | c.6787_6790del  | p.(Tyr2264Thrfs*5)  | Frameshift indel    |
| PGBM28 | <i>NF1</i>  | NM_000267.3 | c.2026_2027insC | p.(Ile679Aspfs*21)  | Frameshift indel    |
| PGBM32 | <i>NF1</i>  | NM_000267.3 | c.4879A>T       | p.(Thr1627Ser)      | Missense            |
| PGBM33 | <i>NF1</i>  | NM_000267.3 | c.1641+1G>T     |                     | Splicing            |

**Supplementary Table 6: Comparison of genes mutated in pediatric GBM and in each of the 4 described adult GBM molecular subgroups**

|                       |        | Pediatric GBM |             | adult GBM Gene-expression based molecular subtypes |             |          |               |             |          |               |             |          |               |             |          |    |
|-----------------------|--------|---------------|-------------|----------------------------------------------------|-------------|----------|---------------|-------------|----------|---------------|-------------|----------|---------------|-------------|----------|----|
| Pathway               | Gene   | No. of tumors | % of tumors | Proneural                                          |             |          | Neural        |             |          | Classical     |             |          | Mesenchymal   |             |          |    |
|                       |        |               |             | No. of tumors                                      | % of tumors | p-value* | No. of tumors | % of tumors | p-value* | No. of tumors | % of tumors | p-value* | No. of tumors | % of tumors | p-value* |    |
| Chromatin Remodelling | H3F3A  | 33/91         | 36          | NA                                                 | NA          | NA       | NA            | NA          | NA       | NA            | NA          | NA       | NA            | NA          | NA       | NA |
|                       | ATRX   | 59/191        | 31          | NA                                                 | NA          | NA       | NA            | NA          | NA       | NA            | NA          | NA       | NA            | NA          | NA       | NA |
|                       | DAXX   | 2/70          | 3           | NA                                                 | NA          | NA       | NA            | NA          | NA       | NA            | NA          | NA       | NA            | NA          | NA       | NA |
|                       | IDH1   | 8/84          | 10          | 11/37                                              | 30          | 0.0124   | 1/19          | 5           | 1        | 0/22          | 0           | 0.2006   | 0/38          | 0           | 0.0564   |    |
| Cell Signalling       | EGFR   | 2/49          | 4           | 6/37                                               | 16          | 0.0703   | 5/19          | 26          | 0.0155   | 7/22          | 32          | 0.0029   | 2/38          | 5           | 1        |    |
|                       | PDGFRA | 4/49          | 8           | 4/37                                               | 11          | 0.7208   | 0/19          | 0           | 0.5702   | 0/22          | 0           | 0.3033   | 0/38          | 0           | 0.1283   |    |
|                       | NF1    | 13/49         | 26          | 2/37                                               | 5           | 0.011    | 3/19          | 16          | 0.5261   | 1/22          | 5           | 0.0499   | 14/38         | 37          | 0.3542   |    |
|                       | PIK3CA | 3/49          | 6           | 3/37                                               | 8           | 1        | 1/19          | 5           | 1        | 1/22          | 5           | 1        | 1/38          | 3           | 0.6286   |    |
|                       | PIK3R1 | 5/49          | 10          | 7/37                                               | 19          | 0.3477   | 2/19          | 11          | 1        | 1/22          | 5           | 0.6583   | 0/38          | 0           | 0.0652   |    |
|                       | PTEN   | 3/49          | 6           | 6/37                                               | 16          | 0.1646   | 4/19          | 21          | 0.0892   | 5/22          | 23          | 0.0971   | 12/38         | 32          | 0.0032   |    |
| Cell Cycle            | TP53   | 27/49         | 55          | 20/37                                              | 54          | 1        | 4/19          | 21          | 0.0149   | 0/22          | 0           | <0.0001  | 12/38         | 32          | 0.0325   |    |
|                       | CDKN2A | 3/49          | 6           | NA                                                 | NA          | NA       | NA            | NA          | NA       | NA            | NA          | NA       | NA            | NA          | NA       |    |
|                       | RB1    | 5/49          | 10          | 1/37                                               | 3           | 0.2302   | 1/19          | 5           | 1        | 0/22          | 0           | 0.3151   | 5/38          | 13          | 0.742    |    |

\*Fisher's two tailed test to compare between pediatric GBM and different subtypes of adult GBM (Proneural, Neural, Classical, Mesenchymal).

N/A: not available

**Supplementary Table 7: Top 100 differentially expressed genes by standard deviation, used for unsupervised hierarchical clustering, ordered as presented in Figure 3b**

|              | G34 Mutant |        |        |        | K27 Mutant |       |       |       |       | SD   | Mean(G34)-Mean(K27) |
|--------------|------------|--------|--------|--------|------------|-------|-------|-------|-------|------|---------------------|
|              | PGBM14     | PGBM15 | PGBM16 | PGBM11 | PGBM2      | PGBM4 | PGBM6 | PGBM8 | PGBM9 |      |                     |
| FOXG1        | 11.79      | 11.92  | 11.32  | 11.89  | 4.11       | 0.00  | 4.17  | 3.17  | 1.72  | 4.96 | 9.09                |
| SP8          | 5.47       | 9.88   | 7.95   | 9.13   | 0.00       | 0.68  | 0.00  | 2.07  | 0.00  | 4.20 | 7.56                |
| DLX6-AS1     | 2.72       | 10.83  | 10.20  | 9.38   | 0.00       | 2.70  | 2.29  | 0.00  | 0.00  | 4.58 | 7.28                |
| DLX2         | 4.03       | 10.96  | 9.26   | 9.25   | 1.26       | 3.69  | 1.20  | 0.38  | 0.00  | 4.28 | 7.07                |
| DLX1         | 5.07       | 11.45  | 10.02  | 9.88   | 2.74       | 4.87  | 0.68  | 2.51  | 0.93  | 4.12 | 6.76                |
| DLX6         | 3.74       | 10.05  | 9.02   | 7.35   | 1.32       | 1.58  | 2.23  | 0.85  | 0.00  | 3.80 | 6.35                |
| C14orf23     | 7.70       | 6.80   | 5.78   | 7.34   | 0.77       | 0.00  | 2.26  | 0.49  | 2.20  | 3.16 | 5.76                |
| DLX5         | 3.87       | 9.48   | 7.36   | 6.77   | 0.26       | 0.58  | 3.55  | 1.20  | 0.93  | 3.39 | 5.57                |
| FZD7         | 8.71       | 8.54   | 10.49  | 9.06   | 2.98       | 1.81  | 3.77  | 6.37  | 4.04  | 3.14 | 5.41                |
| PCK1         | 5.40       | 6.79   | 7.78   | 3.58   | 0.00       | 0.00  | 1.26  | 0.00  | 2.91  | 3.03 | 5.05                |
| NPY          | 7.01       | 6.22   | 11.08  | 11.00  | 3.20       | 3.64  | 4.57  | 3.87  | 3.94  | 3.08 | 4.99                |
| MOXD1        | 5.62       | 6.93   | 10.28  | 10.20  | 6.64       | 3.36  | 1.26  | 4.53  | 4.49  | 2.98 | 4.20                |
| TRD@         | 8.31       | 4.15   | 6.92   | 10.72  | 1.38       | 4.89  | 1.89  | 5.04  | 3.83  | 2.99 | 4.12                |
| NEUROD1      | 3.32       | 8.05   | 3.05   | 9.67   | 0.00       | 3.49  | 1.26  | 3.41  | 4.91  | 3.05 | 3.41                |
| CES1         | 10.48      | 2.46   | 4.04   | 5.86   | 2.83       | 0.00  | 4.14  | 4.65  | 0.00  | 3.19 | 3.39                |
| LOC441179    | 1.38       | 8.96   | 5.35   | 8.56   | 3.04       | 0.26  | 3.79  | 2.32  | 4.41  | 2.99 | 3.30                |
| KIRREL3      | 0.85       | 5.77   | 7.36   | 8.79   | 0.68       | 3.68  | 1.26  | 2.56  | 4.69  | 2.93 | 3.12                |
| LOC100292909 | 4.04       | 7.45   | 9.93   | 5.33   | 0.00       | 4.17  | 1.38  | 6.41  | 6.58  | 3.05 | 2.98                |
| TFPI2        | 0.38       | 5.25   | 9.53   | 6.41   | 0.00       | 0.00  | 0.85  | 8.74  | 2.87  | 3.81 | 2.90                |
| LOC100192378 | 1.14       | 8.73   | 7.59   | 6.04   | 7.39       | 0.00  | 5.00  | 2.83  | 0.00  | 3.40 | 2.83                |
| HLA-DQA1     | 4.52       | 3.95   | 6.79   | 5.76   | 0.14       | 0.14  | 4.96  | 9.56  | 0.00  | 3.33 | 2.30                |
| HES5         | 2.89       | 9.44   | 8.08   | 6.58   | 1.07       | 8.77  | 2.00  | 5.55  | 5.86  | 3.02 | 2.09                |
| PLN          | 0.58       | 10.65  | 4.64   | 7.78   | 4.03       | 0.00  | 3.83  | 6.28  | 5.30  | 3.32 | 2.03                |
| HLA-DQB1     | 0.93       | 3.98   | 5.51   | 5.79   | 0.58       | 0.26  | 0.93  | 8.58  | 0.26  | 3.07 | 1.93                |
| LOC100271840 | 3.83       | 6.14   | 2.94   | 8.37   | 1.96       | 1.14  | 0.68  | 5.57  | 8.06  | 2.88 | 1.84                |
| AQP9         | 9.75       | 1.54   | 0.58   | 3.96   | 1.58       | 2.07  | 3.02  | 6.13  | 1.68  | 2.91 | 1.06                |
| CXCL14       | 9.76       | 5.11   | 4.93   | 5.49   | 1.77       | 1.20  | 12.02 | 7.85  | 6.34  | 3.48 | 0.49                |
| OGDHL        | 5.28       | 0.49   | 0.49   | 8.73   | 0.77       | 6.28  | 6.78  | 1.32  | 2.85  | 3.15 | 0.14                |
| SLC14A1      | 1.20       | 0.68   | 6.00   | 2.26   | 7.90       | 0.49  | 0.00  | 5.75  | 0.14  | 3.01 | -0.32               |
| CNGA3        | 0.00       | 1.43   | 6.83   | 5.15   | 8.57       | 0.00  | 1.14  | 3.35  | 6.10  | 3.17 | -0.48               |
| DDIT4L       | 11.53      | 5.58   | 2.89   | 3.14   | 8.93       | 3.38  | 8.05  | 7.96  | 4.80  | 3.02 | -0.84               |
| COL6A2       | 4.22       | 4.24   | 4.43   | 0.00   | 0.26       | 0.58  | 8.39  | 6.61  | 5.35  | 2.95 | -1.02               |
| CHI3L1       | 13.30      | 4.92   | 7.45   | 9.87   | 8.21       | 8.10  | 13.68 | 12.75 | 7.74  | 3.05 | -1.21               |
| MET          | 8.83       | 5.51   | 4.41   | 6.11   | 3.61       | 12.84 | 4.77  | 11.84 | 4.14  | 3.45 | -1.22               |
| ASCL1        | 1.20       | 11.78  | 10.24  | 9.84   | 11.13      | 9.68  | 7.69  | 8.75  | 10.35 | 3.15 | -1.25               |
| C8orf34      | 0.85       | 5.86   | 4.73   | 3.63   | 10.63      | 1.63  | 4.11  | 7.12  | 3.52  | 2.95 | -1.64               |



|           |       |       |      |       |       |       |       |       |       |      |       |
|-----------|-------|-------|------|-------|-------|-------|-------|-------|-------|------|-------|
| SLC6A15   | 1.38  | 7.21  | 2.79 | 0.49  | 6.18  | 7.81  | 0.00  | 2.63  | 6.80  | 3.08 | -1.72 |
| CRABP1    | 0.85  | 4.82  | 0.49 | 1.20  | 0.00  | 4.46  | 1.07  | 4.93  | 8.57  | 2.89 | -1.97 |
| C1orf192  | 1.77  | 0.68  | 5.78 | 0.00  | 9.55  | 0.85  | 1.00  | 7.12  | 1.81  | 3.41 | -2.01 |
| IL8       | 6.79  | 5.48  | 5.28 | 4.15  | 2.63  | 3.29  | 10.42 | 11.62 | 9.20  | 3.21 | -2.01 |
| AKR1C1    | 12.64 | 3.91  | 4.78 | 4.50  | 9.00  | 9.68  | 5.31  | 9.40  | 9.05  | 3.03 | -2.03 |
| SLC39A12  | 0.93  | 2.96  | 3.83 | 4.12  | 8.75  | 0.38  | 6.07  | 7.77  | 2.20  | 2.91 | -2.07 |
| FSTL5     | 0.68  | 3.93  | 0.38 | 4.90  | 10.54 | 5.79  | 0.00  | 4.83  | 2.29  | 3.35 | -2.22 |
| LTF       | 10.01 | 0.00  | 5.68 | 5.88  | 10.11 | 0.00  | 8.63  | 11.40 | 8.30  | 4.22 | -2.30 |
| NEFL      | 4.12  | 5.89  | 0.58 | 1.72  | 3.91  | 10.69 | 1.63  | 7.85  | 2.89  | 3.27 | -2.31 |
| C2orf40   | 2.70  | 6.16  | 3.97 | 5.22  | 10.44 | 4.54  | 0.58  | 9.94  | 9.27  | 3.41 | -2.44 |
| CDH13     | 1.00  | 0.00  | 6.84 | 1.93  | 6.38  | 0.00  | 6.89  | 6.15  | 5.92  | 3.07 | -2.63 |
| C7orf57   | 2.74  | 0.00  | 3.00 | 0.00  | 9.32  | 1.43  | 0.00  | 6.90  | 2.98  | 3.25 | -2.69 |
| CCL20     | 6.00  | 0.77  | 1.49 | 0.00  | 1.81  | 0.77  | 7.35  | 8.71  | 5.38  | 3.28 | -2.74 |
| KCNA5     | 2.61  | 0.00  | 0.14 | 1.26  | 7.63  | 0.00  | 5.40  | 0.38  | 5.45  | 2.91 | -2.77 |
| GRIA2     | 7.99  | 1.72  | 9.15 | 10.53 | 10.14 | 11.82 | 10.06 | 9.04  | 9.80  | 2.90 | -2.82 |
| SERPINA3  | 11.80 | 1.00  | 9.61 | 9.56  | 12.19 | 7.09  | 13.37 | 11.61 | 9.99  | 3.71 | -2.86 |
| CDH19     | 0.00  | 1.96  | 5.28 | 7.79  | 9.32  | 5.22  | 7.31  | 5.76  | 5.66  | 2.87 | -2.90 |
| SLC44A5   | 0.00  | 9.04  | 5.74 | 8.13  | 8.92  | 8.93  | 7.99  | 7.96  | 9.93  | 3.01 | -3.02 |
| BCHE      | 1.63  | 9.34  | 9.31 | 9.49  | 10.45 | 10.93 | 10.57 | 10.45 | 10.73 | 2.91 | -3.18 |
| LOC157503 | 0.00  | 4.22  | 0.00 | 6.86  | 8.43  | 7.50  | 3.52  | 4.99  | 5.51  | 3.01 | -3.22 |
| SCN7A     | 0.00  | 3.07  | 2.87 | 7.23  | 8.69  | 2.41  | 8.44  | 6.54  | 6.71  | 3.07 | -3.27 |
| OTX2      | 0.00  | 5.19  | 2.49 | 0.00  | 8.92  | 0.00  | 8.56  | 6.81  | 1.68  | 3.70 | -3.27 |
| DPP10     | 3.10  | 10.40 | 2.74 | 2.23  | 8.04  | 8.03  | 7.10  | 7.95  | 8.36  | 2.95 | -3.28 |
| AKR1C2    | 12.37 | 1.20  | 2.29 | 2.04  | 8.07  | 9.35  | 3.64  | 9.28  | 8.41  | 4.03 | -3.28 |
| PAK7      | 0.00  | 6.65  | 3.05 | 2.26  | 7.67  | 8.49  | 3.12  | 5.31  | 6.94  | 2.86 | -3.31 |
| CALB1     | 7.79  | 0.00  | 1.14 | 2.61  | 3.32  | 7.24  | 6.17  | 7.92  | 6.57  | 3.02 | -3.36 |
| RALGAPA2  | 0.00  | 0.38  | 3.57 | 3.90  | 7.38  | 8.85  | 0.00  | 5.57  | 5.08  | 3.24 | -3.41 |
| STMN2     | 4.09  | 10.37 | 2.38 | 8.83  | 7.94  | 11.89 | 9.93  | 9.05  | 10.51 | 3.13 | -3.45 |
| DCC       | 0.00  | 7.97  | 1.89 | 5.32  | 6.13  | 9.29  | 7.47  | 6.39  | 7.94  | 3.04 | -3.65 |
| GRIN2A    | 2.89  | 0.77  | 2.41 | 0.68  | 9.86  | 1.54  | 4.00  | 5.29  | 6.17  | 2.99 | -3.69 |
| CTNNA2    | 1.26  | 9.33  | 6.22 | 4.86  | 11.04 | 8.95  | 8.03  | 8.75  | 8.92  | 2.94 | -3.72 |
| KLRC4     | 4.25  | 0.58  | 0.00 | 2.91  | 1.00  | 6.99  | 8.50  | 5.69  | 7.25  | 3.17 | -3.95 |
| PCDH7     | 2.00  | 7.03  | 2.32 | 10.51 | 10.94 | 8.51  | 8.87  | 9.09  | 9.70  | 3.32 | -3.96 |
| ALDH3A3   | 0.14  | 5.89  | 0.00 | 1.07  | 6.85  | 2.20  | 6.51  | 6.33  | 6.78  | 3.04 | -3.96 |
| RALYL     | 0.93  | 5.21  | 3.90 | 2.32  | 8.76  | 8.21  | 2.77  | 7.45  | 8.43  | 2.99 | -4.04 |
| TTC9B     | 0.68  | 2.85  | 0.68 | 0.85  | 1.07  | 7.62  | 6.68  | 4.89  | 6.42  | 2.89 | -4.07 |
| TMEFF2    | 0.85  | 8.22  | 3.58 | 5.65  | 8.61  | 9.90  | 7.58  | 7.85  | 9.37  | 2.96 | -4.08 |
| INSM1     | 0.38  | 0.68  | 0.00 | 0.00  | 0.00  | 8.04  | 1.26  | 5.33  | 7.61  | 3.41 | -4.18 |
| UGT8      | 0.49  | 4.48  | 5.46 | 8.07  | 8.90  | 9.54  | 7.29  | 8.46  | 10.00 | 3.03 | -4.21 |
| RIT2      | 0.58  | 6.96  | 4.67 | 6.08  | 9.99  | 10.69 | 7.24  | 7.15  | 9.00  | 3.04 | -4.24 |
| OGN       | 0.00  | 3.10  | 0.00 | 0.14  | 12.07 | 0.14  | 3.56  | 6.22  | 3.29  | 3.99 | -4.25 |
| H19       | 3.32  | 2.00  | 4.80 | 4.38  | 7.12  | 6.50  | 11.57 | 5.65  | 8.60  | 2.89 | -4.26 |
| NEGR1     | 0.00  | 8.91  | 1.81 | 7.28  | 10.16 | 9.38  | 7.69  | 8.15  | 8.46  | 3.52 | -4.27 |
| SHISA6    | 4.07  | 2.85  | 4.24 | 0.26  | 9.25  | 4.38  | 8.80  | 5.71  | 7.55  | 2.91 | -4.28 |
| KLRC3     | 4.94  | 0.14  | 2.70 | 4.41  | 4.55  | 8.46  | 7.81  | 7.09  | 8.83  | 2.89 | -4.30 |
| FAM19A5   | 0.00  | 2.54  | 7.12 | 4.71  | 8.87  | 8.64  | 8.25  | 6.31  | 9.57  | 3.23 | -4.74 |
| SLC7A2    | 5.08  | 0.14  | 1.93 | 0.38  | 7.67  | 5.77  | 5.45  | 7.69  | 6.82  | 2.98 | -4.80 |
| SUSD5     | 6.98  | 3.51  | 0.14 | 4.36  | 9.03  | 8.53  | 9.60  | 8.14  | 7.99  | 3.15 | -4.91 |
| ODZ2      | 2.58  | 6.04  | 1.20 | 4.12  | 8.22  | 7.21  | 10.37 | 7.23  | 9.07  | 3.05 | -4.93 |
| DLK1      | 6.85  | 5.16  | 0.00 | 2.43  | 6.68  | 3.92  | 11.63 | 9.52  | 11.05 | 3.93 | -4.95 |
| MYT1      | 1.63  | 4.14  | 0.93 | 0.26  | 4.15  | 9.02  | 6.90  | 5.78  | 7.93  | 3.14 | -5.02 |
| KCND2     | 2.72  | 5.26  | 2.20 | 6.52  | 9.36  | 9.93  | 8.35  | 8.46  | 9.99  | 2.99 | -5.04 |
| KCNJ9     | 0.77  | 3.70  | 0.93 | 0.00  | 8.38  | 7.11  | 7.67  | 2.83  | 6.00  | 3.23 | -5.05 |
| LHFPL3    | 6.18  | 4.49  | 3.49 | 7.94  | 11.34 | 10.58 | 10.26 | 9.37  | 11.40 | 2.99 | -5.07 |
| FAM5C     | 5.73  | 2.35  | 0.26 | 5.26  | 8.02  | 9.32  | 8.23  | 8.06  | 9.05  | 3.16 | -5.14 |
| DBC1      | 1.63  | 2.10  | 1.96 | 3.29  | 9.49  | 7.00  | 10.00 | 6.35  | 6.28  | 3.23 | -5.57 |
| OPCML     | 0.49  | 4.28  | 4.80 | 5.00  | 9.81  | 9.14  | 8.76  | 8.25  | 10.58 | 3.32 | -5.67 |
| CA10      | 3.51  | 2.20  | 2.14 | 2.04  | 6.50  | 8.97  | 8.03  | 8.05  | 9.60  | 3.18 | -5.76 |
| GPR17     | 1.07  | 2.93  | 0.00 | 0.00  | 6.49  | 5.31  | 5.19  | 8.68  | 8.63  | 3.43 | -5.86 |
| CADM2     | 1.43  | 4.88  | 0.26 | 5.59  | 9.30  | 9.03  | 9.14  | 8.26  | 9.30  | 3.54 | -5.97 |
| NXPH1     | 0.14  | 4.79  | 3.55 | 3.88  | 8.34  | 10.20 | 8.91  | 8.69  | 9.68  | 3.48 | -6.08 |
| SFRP2     | 3.49  | 2.51  | 2.38 | 0.49  | 10.24 | 7.76  | 7.35  | 7.95  | 8.62  | 3.44 | -6.17 |
| OLIG1     | 4.75  | 2.93  | 5.34 | 4.13  | 8.65  | 12.51 | 11.25 | 10.75 | 12.15 | 3.78 | -6.77 |
| MEGF11    | 0.00  | 0.85  | 1.43 | 2.49  | 8.21  | 7.80  | 8.33  | 7.09  | 10.24 | 3.91 | -7.14 |

Supplementary Table 8: Numbers of CNAs of each type identified in each tumour sample

| ID     | GAINS      |       |       |             | DELETIONS  |       |       |            | LOH        |       |       |           | Total Losses | Total CNAs | CNA Grouping Group 1/2 | H3F3A Mut Y/N | ATRX Mut Y/N | DAXX Mut Y/N |
|--------|------------|-------|-------|-------------|------------|-------|-------|------------|------------|-------|-------|-----------|--------------|------------|------------------------|---------------|--------------|--------------|
|        | Whole Chr. | Broad | Focal | Total Gains | Whole Chr. | Broad | Focal | Total Dels | Whole Chr. | Broad | Focal | Total LOH |              |            |                        |               |              |              |
| PGBM1  | 0          | 2     | 2     | 4           | 0          | 0     | 0     | 0          | 1          | 3     | 2     | 6         | 6            | 10         | 2                      | Y             | Y            | N            |
| PGBM2  | 3          | 1     | 2     | 6           | 0          | 0     | 0     | 0          | 4          | 10    | 2     | 16        | 16           | 22         | 2                      | Y             | N            | N            |
| PGBM3  | 2          | 10    | 7     | 19          | 0          | 0     | 0     | 0          | 3          | 22    | 5     | 30        | 30           | 49         | 2                      | Y             | N            | N            |
| PGBM4  | 0          | 15    | 9     | 24          | 0          | 0     | 0     | 0          | 4          | 17    | 3     | 24        | 24           | 48         | 2                      | Y             | Y            | N            |
| PGBM5  | 0          | 4     | 0     | 4           | 0          | 0     | 0     | 0          | 2          | 19    | 4     | 25        | 25           | 29         | 2                      | Y             | N            | N            |
| PGBM6  | 0          | 3     | 1     | 4           | 0          | 0     | 0     | 0          | 0          | 5     | 6     | 11        | 11           | 15         | 2                      | Y             | Y            | N            |
| PGBM11 | 0          | 7     | 11    | 18          | 0          | 0     | 2     | 2          | 0          | 16    | 2     | 18        | 20           | 38         | 2                      | Y             | Y            | N            |
| PGBM12 | 1          | 2     | 0     | 3           | 0          | 0     | 3     | 3          | 1          | 22    | 8     | 31        | 34           | 37         | 2                      | Y             | Y            | N            |
| PGBM13 | 1          | 2     | 1     | 4           | 0          | 0     | 0     | 0          | 1          | 4     | 1     | 6         | 6            | 10         | 2                      | Y             | Y            | N            |
| PGBM14 | 0          | 3     | 1     | 4           | 0          | 0     | 0     | 0          | 11         | 10    | 1     | 22        | 22           | 26         | 2                      | Y             | Y            | N            |
| PGBM18 | 0          | 2     | 1     | 3           | 0          | 0     | 0     | 0          | 1          | 3     | 2     | 6         | 6            | 9          | 1                      | N             | Y            | N            |
| PGBM19 | 1          | 0     | 0     | 1           | 0          | 0     | 0     | 0          | 17         | 3     | 0     | 20        | 20           | 21         | 2                      | N             | Y            | Y            |
| PGBM20 | 1          | 5     | 4     | 10          | 0          | 0     | 0     | 0          | 1          | 23    | 17    | 41        | 41           | 51         | 2                      | N             | Y            | N            |
| PGBM21 | 0          | 4     | 3     | 7           | 0          | 0     | 0     | 0          | 13         | 7     | 1     | 21        | 21           | 28         | 2                      | N             | N            | Y            |
| PGBM23 | 0          | 1     | 0     | 1           | 0          | 0     | 0     | 0          | 0          | 3     | 0     | 3         | 3            | 4          | 1                      | N             | N            | N            |
| PGBM24 | 0          | 10    | 1     | 11          | 0          | 0     | 2     | 2          | 8          | 15    | 3     | 26        | 28           | 39         | 2                      | N             | N            | N            |
| PGBM25 | 0          | 6     | 11    | 17          | 0          | 1     | 4     | 5          | 11         | 14    | 3     | 28        | 33           | 50         | 2                      | N             | N            | N            |
| PGBM26 | 2          | 4     | 11    | 17          | 0          | 0     | 0     | 0          | 8          | 5     | 3     | 16        | 16           | 33         | 2                      | N             | N            | N            |
| PGBM27 | 3          | 5     | 14    | 22          | 0          | 1     | 0     | 1          | 9          | 14    | 5     | 28        | 29           | 51         | 2                      | N             | N            | N            |
| PGBM31 | 0          | 7     | 5     | 12          | 0          | 0     | 0     | 0          | 1          | 3     | 0     | 4         | 4            | 16         | 2                      | N             | N            | N            |
| PGBM32 | 0          | 2     | 2     | 4           | 0          | 0     | 0     | 0          | 0          | 2     | 3     | 5         | 5            | 9          | 1                      | N             | N            | N            |
| PGBM34 | 3          | 11    | 8     | 22          | 0          | 1     | 1     | 2          | 4          | 18    | 2     | 24        | 26           | 48         | 2                      | N             | N            | N            |
| PGBM35 | 0          | 1     | 1     | 2           | 0          | 0     | 0     | 0          | 3          | 1     | 0     | 4         | 4            | 6          | 1                      | N             | N            | N            |
| PGBM36 | 0          | 0     | 2     | 2           | 0          | 0     | 0     | 0          | 0          | 1     | 2     | 3         | 3            | 5          | 1                      | N             | N            | N            |
| PGBM37 | 0          | 1     | 0     | 1           | 0          | 0     | 0     | 0          | 0          | 5     | 2     | 7         | 7            | 8          | 1                      | N             | N            | N            |
| PGBM39 | 3          | 1     | 0     | 4           | 0          | 0     | 3     | 3          | 3          | 2     | 12    | 17        | 20           | 24         | 2                      | N             | N            | N            |
| PGBM40 | 0          | 0     | 0     | 0           | 0          | 0     | 0     | 0          | 0          | 0     | 0     | 0         | 0            | 0          | 1                      | N             | N            | N            |
| PGBM41 | 0          | 0     | 0     | 0           | 0          | 0     | 0     | 0          | 0          | 0     | 1     | 1         | 1            | 1          | 1                      | N             | N            | N            |
| PGBM42 | 0          | 0     | 0     | 0           | 0          | 0     | 0     | 0          | 0          | 1     | 0     | 1         | 1            | 1          | 1                      | N             | N            | N            |
| PGBM43 | 0          | 5     | 16    | 21          | 0          | 0     | 4     | 4          | 5          | 18    | 9     | 32        | 36           | 57         | 2                      | N             | N            | N            |
| PGBM45 | 0          | 1     | 6     | 7           | 0          | 0     | 0     | 0          | 0          | 1     | 6     | 7         | 7            | 14         | 2                      | N             | N            | N            |
| Totals | 20         | 115   | 119   | 254         | 0          | 3     | 19    | 22         | 111        | 267   | 105   | 483       | 505          | 759        |                        |               |              |              |
| Mean   | 0.65       | 3.71  | 3.84  | 8.19        | 0.00       | 0.10  | 0.61  | 0.71       | 3.58       | 8.61  | 3.39  | 15.58     | 16.29        | 24.48      |                        |               |              |              |

Supplementary Table 9: CNA regions identified in each tumour sample

| Sample | GAINS     |                   |               | DELETIONS |       |       | LOH              |                   |                 |
|--------|-----------|-------------------|---------------|-----------|-------|-------|------------------|-------------------|-----------------|
|        | Whole Chr | Broad             | Focal         | Whole Chr | Broad | Focal | Whole Chr        | Broad             | Focal           |
| PGBM1  |           | 11q13.1-11q25     | 11q22.3       |           |       |       | 16               | 10q21.3-10q26.3   | 11q14.1         |
|        |           | 17p13.2-17p13.3   | 18q23         |           |       |       |                  | 15q               | 15q26.3         |
|        |           |                   |               |           |       |       |                  | Xp21.2-Xp22.33    |                 |
| PGBM2  | 4         | 10q25.3-10q26.3   | 5p14.3-5p12   |           |       |       | 3                | 5q                | 5p15.31         |
|        | 8         |                   | 13q34         |           |       |       | 7                | 5p15.2-5p14.3     | 5p15.33         |
|        | 19        |                   |               |           |       |       | 9                | 10p               |                 |
|        |           |                   |               |           |       |       | 18               | 10q               |                 |
|        |           |                   |               |           |       |       |                  | 12q24.31-12q24.33 |                 |
|        |           |                   |               |           |       |       |                  | 13q14.11-13q34    |                 |
|        |           |                   |               |           |       |       |                  | 14q               |                 |
|        |           |                   |               |           |       |       |                  | 17p13.1-17p13.3   |                 |
|        |           |                   |               |           |       |       |                  | 21q               |                 |
|        |           |                   |               |           |       |       |                  | 22q               |                 |
| PGBM3  | 7         | 1q                | 1q31.2-1q31.3 |           |       |       | 4                | 1p                | 5q31.3          |
|        | X         | 9p                | 5q21.1        |           |       |       | 8                | 2p14-2q37.3       | 5q33.1-5q34     |
|        |           | 14q11.2-14q24.2   | 6p24.3        |           |       |       | 10               | 3p                | 14q24.3         |
|        |           | 14q24.3-14q31.3   | 6p12.1-6p11.2 |           |       |       |                  | 5q11.2-5q21.3     | 17q11.2         |
|        |           | 16p               | 17q21.31      |           |       |       |                  | 5q22.2-5q23.2     | 11q14.1         |
|        |           | 18p               | 17q11.2       |           |       |       |                  | 5q23.2-5q31.1     |                 |
|        |           | 20p12.3-20p13     | 11p14.1-11p13 |           |       |       |                  | 5q31.1-5q32       |                 |
|        |           | 21q               |               |           |       |       |                  | 5q35.1-5q35.3     |                 |
|        |           | 12q15-12p13.33    |               |           |       |       |                  | 7q31.31-7q32.1    |                 |
|        |           | 11p12-11p11.2     |               |           |       |       |                  | 8q11.1-8q12.1     |                 |
|        |           |                   |               |           |       |       |                  | 8q13.2-8q21.13    |                 |
|        |           |                   |               |           |       |       |                  | 9q                |                 |
|        |           |                   |               |           |       |       |                  | 11p14.1-11p15.5   |                 |
|        |           |                   |               |           |       |       |                  | 11p11.2           |                 |
|        |           |                   |               |           |       |       |                  | 12q15-12q24.33    |                 |
|        |           |                   |               |           |       |       | 12p13.31-12p12.3 |                   |                 |
|        |           |                   |               |           |       |       | 12q12-12q13.13   |                   |                 |
|        |           |                   |               |           |       |       | 13q              |                   |                 |
|        |           |                   |               |           |       |       | 14q31.3-14q32.33 |                   |                 |
|        |           |                   |               |           |       |       | 17q21.33-17p13.3 |                   |                 |
|        |           |                   |               |           |       |       | 17q21.33-17q25.3 |                   |                 |
|        |           |                   |               |           |       |       | 22q              |                   |                 |
| PGBM4  |           | 1p13.3-1q44       | 4q12          |           |       |       | 9                | 3q11.2-3q25.33    | 7p22.1-7p22.3   |
|        |           | 2p15-2p25.3       | 4q31.21       |           |       |       | 11               | 4q12-4q25         | 7q31.2-7q31.31  |
|        |           | 3q25.33-3q29      | 4q31.23       |           |       |       | 16               | 4q32.3-4q35.2     | 8p11.22-8p11.21 |
|        |           | 3q26.32-3q29      | 4q34.1        |           |       |       | 20               | 5q21.1-5q35.3     |                 |
|        |           | 4q25-4q26         | 7q31.2        |           |       |       |                  | 6q13-6q27         |                 |
|        |           | 4q26-4q28.2       | 8q24.21       |           |       |       |                  | 7p21.3-7p21.1     |                 |
|        |           | 4q31.3-4q32.1     | 10q26.13      |           |       |       |                  | 7p21.1-7p11.2     |                 |
|        |           | 4q32.1-4q32.3     | 10q26.2       |           |       |       |                  | 7q35.1-7q36.3     |                 |
|        |           | 10q23.31-10q23.33 | 20p13         |           |       |       |                  | 8p12-8p23.3       |                 |
|        |           | 12q12-12q13.13    |               |           |       |       |                  | 8q                |                 |
|        |           | 12q23.3-12q24.31  |               |           |       |       |                  | 10q21.2-10q22.3   |                 |
|        |           | 14q11.2           |               |           |       |       |                  | 12p               |                 |
|        |           | 14q21.1-14q21.2   |               |           |       |       |                  | 12q               |                 |
|        |           | 14q21.2-14q21.3   |               |           |       |       |                  | 13q               |                 |
|        |           | 16q11.2-16q23.1   |               |           |       |       |                  | 14q               |                 |
|        |           |                   |               |           |       |       | 17p              |                   |                 |
|        |           |                   |               |           |       |       | 22q              |                   |                 |
| PGBM5  |           | 15q11.2-15q14     |               |           |       |       | 1                | 2p                | 13q31.1         |
|        |           | 15q25.1-15q26.3   |               |           |       |       | 6                | 2q11.2-2q12.3     | 13q31.3         |
|        |           | 17q21.32-17q25.3  |               |           |       |       |                  | 2q31.1-2q34       | 13q32.1-13q32.2 |
|        |           | 19p13.11-19p12    |               |           |       |       |                  | 2q34-2q37.3       | 17q11.2         |
|        |           |                   |               |           |       |       |                  | 3p21.31-3p26.3    |                 |
|        |           |                   |               |           |       |       |                  | 5q                |                 |
|        |           |                   |               |           |       |       | 9p21.2-9p24.3    |                   |                 |
|        |           |                   |               |           |       |       | 10p14-10p15.3    |                   |                 |
|        |           |                   |               |           |       |       | 10p12.1-10q26.3  |                   |                 |
|        |           |                   |               |           |       |       | 11p              |                   |                 |

|               |    |                  |                   |  |          |    |                   |                 |
|---------------|----|------------------|-------------------|--|----------|----|-------------------|-----------------|
|               |    |                  |                   |  |          |    | 12q13.11-12q24.33 |                 |
|               |    |                  |                   |  |          |    | 14q23.3-14q32.33  |                 |
|               |    |                  |                   |  |          |    | 15q15.1-15q22.2   |                 |
|               |    |                  |                   |  |          |    | 16q               |                 |
|               |    |                  |                   |  |          |    | 17p               |                 |
|               |    |                  |                   |  |          |    | 17q11.2-17q21.32  |                 |
|               |    |                  |                   |  |          |    | 19q               |                 |
|               |    |                  |                   |  |          |    | 21q11.2-21q21.1   |                 |
|               |    |                  |                   |  |          |    | 21q21.2-21q21.3   |                 |
| <b>PGBM6</b>  |    | 1q               | 10q22.3           |  |          |    | 1p31.1-1p11.2     | 4q26-4q27       |
|               |    | 9p23-9p21.1      |                   |  |          |    | 9p23-9p24.3       | 10q23.1         |
|               |    | 9q31.1-9q34.3    |                   |  |          |    | 9p21.1-9q31.1     | 10q23.1         |
|               |    |                  |                   |  |          |    | 10q23.31-10q25.1  | 10q23.1         |
|               |    |                  |                   |  |          |    | 19q               | 10q22.3         |
|               |    |                  |                   |  |          |    |                   | 10q22.3         |
| <b>PGBM11</b> |    | 2p24.2-2p25.3    | 5q31.3            |  | 10q23.31 |    | 1q31.1-1q44       | 2q22.2-2q22.1   |
|               |    | 2q24.2-2q37.3    | 7p21.3            |  | Xp11.3   |    | 1q24.2-1q21.1     | 5q13.1          |
|               |    | 5p15.2-5p15.33   | 7p22.2            |  |          |    | 9p22.1-9p24.3     |                 |
|               |    | 5q13.2-5q31.3    | 7p22.3            |  |          |    | 9p21.3-9p21.2     |                 |
|               |    | 7p21.1-7p21.3    | 7p22.3            |  |          |    | 10q23.31-10q26.3  |                 |
|               |    | 10p12.31-10p15.3 | 9p21.3            |  |          |    | 10q21.1-10q23.1   |                 |
|               |    | 17q24.2-17q25.3  | 10q22.3           |  |          |    | 11p               |                 |
|               |    |                  | 10p11.22-10p11.21 |  |          |    | 12q               |                 |
|               |    |                  | 16q21-16q22.1     |  |          |    | 13q               |                 |
|               |    |                  | 20p13             |  |          |    | 16p11.2-16q24.3   |                 |
|               |    |                  | Xp11.22-Xp11.21   |  |          |    | 17p11.2-17p13.3   |                 |
|               |    |                  |                   |  |          |    | 18q11.2-18q12.2   |                 |
|               |    |                  |                   |  |          |    | 18q12.2-18q23     |                 |
|               |    |                  |                   |  |          |    | 20p               |                 |
|               |    |                  |                   |  |          |    | 20q               |                 |
|               |    |                  |                   |  |          |    | 21q               |                 |
| <b>PGBM12</b> | 7  | 3q26.31-3q29     |                   |  | 4q31.23  | 8  | 1q23.2-1q43       | 5q34            |
|               |    | 22q13.2-22q13.33 |                   |  | 10q22.1  |    | 2p                | 11q14.1         |
|               |    |                  |                   |  | 17p13.3  |    | 3q12.1-3q26.1     | 11q22.1         |
|               |    |                  |                   |  |          |    | 3q26.1-3q26.31    | 11q22.1         |
|               |    |                  |                   |  |          |    | 4q                | 11q22.1-11q24.3 |
|               |    |                  |                   |  |          |    | 8p21.1-8p12       | 15q26.3         |
|               |    |                  |                   |  |          |    | 8p11.22-8p11.21   | 16q24.3         |
|               |    |                  |                   |  |          |    | 9p24.1-9p24.3     | 18q23           |
|               |    |                  |                   |  |          |    | 9p24.1-9p13.1     |                 |
|               |    |                  |                   |  |          |    | 9q31.1-9q21.11    |                 |
|               |    |                  |                   |  |          |    | 9q31.1-9q33.2     |                 |
|               |    |                  |                   |  |          |    | 9q33.2-9q34.3     |                 |
|               |    |                  |                   |  |          |    | 10p               |                 |
|               |    |                  |                   |  |          |    | 10q11.21-10q25.1  |                 |
|               |    |                  |                   |  |          |    | 10q25.1-10q26.3   |                 |
|               |    |                  |                   |  |          |    | 14q               |                 |
|               |    |                  |                   |  |          |    | 14q31.3-14q32.31  |                 |
|               |    |                  |                   |  |          |    | 15q               |                 |
|               |    |                  |                   |  |          |    | 16p               |                 |
|               |    |                  |                   |  |          |    | 18q21.2-18q23     |                 |
|               |    |                  |                   |  |          |    | 19p13.11-19p13.3  |                 |
|               |    |                  |                   |  |          |    | 19q13.32-19q13.43 |                 |
| <b>PGBM13</b> | 20 | 1q               | 5q13.2-5q13.3     |  |          | 17 | 3p12.1-3q26.1     | 6q12            |
|               |    | 12p12.3-12p13.33 |                   |  |          |    | 4p15.31-4p16.3    |                 |
|               |    |                  |                   |  |          |    | 4p15.31-4q35.2    |                 |
|               |    |                  |                   |  |          |    | 11q24.3-11q25     |                 |
| <b>PGBM14</b> |    | 4p15.33-4q13.1   | 4q32.1-4q32.3     |  |          | 2  | 3q                | 18q23           |
|               |    | 4q26-4q35.2      |                   |  |          | 6  | 4q13.1-4q26       |                 |
|               |    | 17q12-17q25.3    |                   |  |          | 7  | 9p                |                 |
|               |    |                  |                   |  |          | 8  | 9q                |                 |
|               |    |                  |                   |  |          | 10 | 13q               |                 |
|               |    |                  |                   |  |          | 11 | 14q               |                 |
|               |    |                  |                   |  |          | 12 | 15q               |                 |
|               |    |                  |                   |  |          | 16 | 19q13.42-19q13.43 |                 |
|               |    |                  |                   |  |          | 18 | 21q               |                 |

|               |    |                   |                  |  |        |    |                  |                 |
|---------------|----|-------------------|------------------|--|--------|----|------------------|-----------------|
|               |    |                   |                  |  |        | 19 | 22q              |                 |
|               |    |                   |                  |  |        | 20 |                  |                 |
| <b>PGBM18</b> |    | 1q                | 13q13.3          |  |        | 10 | 3q27.2-3q29      | 8p23.2-8p23.3   |
|               |    | 9q                |                  |  |        |    | 9p               | 12q24.33        |
|               |    |                   |                  |  |        |    | 22q12.1-22q13.33 |                 |
| <b>PGBM19</b> | X  |                   |                  |  |        | 1  | 13q              |                 |
|               |    |                   |                  |  |        | 2  | 14q              |                 |
|               |    |                   |                  |  |        | 3  | 15q              |                 |
|               |    |                   |                  |  |        | 4  |                  |                 |
|               |    |                   |                  |  |        | 5  |                  |                 |
|               |    |                   |                  |  |        | 6  |                  |                 |
|               |    |                   |                  |  |        | 8  |                  |                 |
|               |    |                   |                  |  |        | 9  |                  |                 |
|               |    |                   |                  |  |        | 10 |                  |                 |
|               |    |                   |                  |  |        | 11 |                  |                 |
|               |    |                   |                  |  |        | 12 |                  |                 |
|               |    |                   |                  |  |        | 16 |                  |                 |
|               |    |                   |                  |  |        | 17 |                  |                 |
|               |    |                   |                  |  |        | 19 |                  |                 |
|               |    |                   |                  |  |        | 20 |                  |                 |
|               |    |                   |                  |  |        | 21 |                  |                 |
|               |    |                   |                  |  |        | 22 |                  |                 |
| <b>PGBM20</b> | 19 | 10p12.2-10p15.3   | 2p24.3-2p24.2    |  |        | 9  | 1p               | 5q23.2          |
|               |    | 15q25.1-15q26.3   | 2q14.2           |  |        |    | 3q11.2-3q28      | 6p24.3          |
|               |    | 16p13.12-16p13.3  | 2q14.3           |  |        |    | 5q31.1-5q34      | 6p22.3          |
|               |    | 18p11.31-18p11.21 | 15q23            |  |        |    | 5q35.2-5q35.3    | 6p21.2-6p21.1   |
|               |    | 20p13-20q11.23    |                  |  |        |    | 6p22.3-6p21.32   | 6p21.1          |
|               |    |                   |                  |  |        |    | 6q12-6q13        | 6p12.1-6p11.2   |
|               |    |                   |                  |  |        |    | 6q13-6q14.1      | 6q15            |
|               |    |                   |                  |  |        |    | 6q23.3-6q24.2    | 6q22.31         |
|               |    |                   |                  |  |        |    | 8p23.1-8p23.3    | 6q24.3-6q25.1   |
|               |    |                   |                  |  |        |    | 10q25.3-10q26.3  | 6q25.3          |
|               |    |                   |                  |  |        |    | 11p12-11q25      | 6q25.3          |
|               |    |                   |                  |  |        |    | 11p13-11p12      | 6q26            |
|               |    |                   |                  |  |        |    | 11p14.1-11p15.5  | 6q27            |
|               |    |                   |                  |  |        |    | 12p12.1-12p13.33 | 6q27            |
|               |    |                   |                  |  |        |    | 14q11.2-14q23.3  | 11p14.111p13    |
|               |    |                   |                  |  |        |    | 14q23.3-14q31.3  | 18q12.3         |
|               |    |                   |                  |  |        |    | 16p13.12-16q24.3 | 18q21.1         |
|               |    |                   |                  |  |        |    | 17p              |                 |
|               |    |                   |                  |  |        |    | 17q              |                 |
|               |    |                   |                  |  |        |    | 18q11.2-18q12.1  |                 |
|               |    |                   |                  |  |        |    | 18q11.1-18q12.3  |                 |
|               |    |                   |                  |  |        |    | 18q12.3          |                 |
|               |    |                   |                  |  |        |    | 22q              |                 |
| <b>PGBM21</b> |    | 2q11.2-2q21.2     | 20p12.1-20p11.23 |  |        | 1  | 6p21.1-6p25.3    | Xp22.32         |
|               |    | 6p21.1-6q27       | 22q11.23         |  |        | 2  | 13q              |                 |
|               |    | 17q24.2-17q24.3   | Xp22.33          |  |        | 3  | 14q              |                 |
|               |    | 20q12-20q13.33    |                  |  |        | 4  | 15q              |                 |
|               |    |                   |                  |  |        | 5  | 20p13-20q12      |                 |
|               |    |                   |                  |  |        | 8  | 21q              |                 |
|               |    |                   |                  |  |        | 9  | 22q              |                 |
|               |    |                   |                  |  |        | 10 |                  |                 |
|               |    |                   |                  |  |        | 11 |                  |                 |
|               |    |                   |                  |  |        | 16 |                  |                 |
|               |    |                   |                  |  |        | 17 |                  |                 |
|               |    |                   |                  |  |        | 18 |                  |                 |
|               |    |                   |                  |  |        | 19 |                  |                 |
| <b>PGBM23</b> |    | 7q                |                  |  |        |    | 13q              |                 |
|               |    |                   |                  |  |        |    | 17p13.1-17p13.3  |                 |
|               |    |                   |                  |  |        |    | 19q              |                 |
| <b>PGBM24</b> |    | 2p24.1-2p25.3     | 12p13.2-12p13.1  |  | 9p21.3 | 3  | 3q28-3q29        | 11p14.3         |
|               |    | 2q24.1-2q33.2     |                  |  | 15q14  | 4  | 9p               | 11p14.2-11p14.1 |
|               |    | 2q33.2-2q35       |                  |  |        | 5  | 9q34.13-9q34.3   | 11p11.2         |

|               |    |                   |                   |                 |               |    |                   |               |
|---------------|----|-------------------|-------------------|-----------------|---------------|----|-------------------|---------------|
|               |    | 4q26-4q31.22      |                   |                 |               | 6  | 10p15.3-10q26.12  |               |
|               |    | 7p14.1-7p11.2     |                   |                 |               | 8  | 11p15.2-11p15.5   |               |
|               |    | 7q11.23-7q36.3    |                   |                 |               | 12 | 11p15.2-11p15.1   |               |
|               |    | 10q26.12-10q26.3  |                   |                 |               | 17 | 11p14.1-11p13     |               |
|               |    | 13q21.31-13q34    |                   |                 |               | 18 | 11p13-11p12       |               |
|               |    | 15q23-15q26.3     |                   |                 |               |    | 13q12.11-13q21.31 |               |
|               |    | 16p13.3           |                   |                 |               |    | 14q12-14q32.33    |               |
|               |    |                   |                   |                 |               |    | 15q11.2-15q23     |               |
|               |    |                   |                   |                 |               |    | 16p11.2-16p13.3   |               |
|               |    |                   |                   |                 |               |    | 16q12.1-16q24.3   |               |
|               |    |                   |                   |                 |               |    | 19q13.2-19q13.43  |               |
|               |    |                   |                   |                 |               |    | 22q               |               |
| <b>PGBM25</b> |    | 4q26-4q28.1       | 2q33.2-2q33.3     | 9p21.3-9p21.2   | 2q22.1-2q22.2 | 1  | 4q32.3-4q35.2     | 4p14-4p13     |
|               |    | 7p                | 3q13.32           |                 | 3q13.2        | 2  | 5q15-5q35.3       | 4q28.2        |
|               |    | 8p                | 3q26.33-3q27.1    |                 | 9p23          | 3  | 6p-6q13           | 17p13.3       |
|               |    | 8q24.13-8q24.22   | 4q12              |                 | Xp21.2        | 9  | 6p12.1-6p11.2     |               |
|               |    | 10q26.3           | 8q11.21-8q11.23   |                 |               | 10 | 6q13-6q25.3       |               |
|               |    | 15q25.1           | 8q24.22           |                 |               | 11 | 6q25.3-6q27       |               |
|               |    |                   | 9p24.3-9p24.2     |                 |               | 16 | 8q12.1-8q23.3     |               |
|               |    |                   | 10q21.1           |                 |               | 17 | 8q24.22-8q24.3    |               |
|               |    |                   | 10q25.1           |                 |               | 18 | 12q               |               |
|               |    |                   | 10q25.3           |                 |               | 19 | 13q               |               |
|               |    |                   | 10q26.2-10q26.3   |                 |               | 20 | 14q               |               |
|               |    |                   |                   |                 |               |    | 15q14-15q26.3     |               |
|               |    |                   |                   |                 |               |    | 21q               |               |
|               |    |                   |                   |                 |               |    | 22q               |               |
| <b>PGBM26</b> | 16 | 9q33.3-9q34.3     | 5p13.2            |                 |               | 2  | 1q42.13-1q44      | 19p13.2       |
|               | 20 | 12q24.31-12p13.33 | 7q21.2            |                 |               | 3  | 13q               | 19p13.2       |
|               |    | 14q               | 10p12.2           |                 |               | 4  | 15q               | 19p12-19p11   |
|               |    | 21q               | 13q14.3           |                 |               | 5  | 19p13.3           |               |
|               |    |                   | 13q21.1           |                 |               | 6  | 22q               |               |
|               |    |                   | 13q31.1           |                 |               | 8  |                   |               |
|               |    |                   | 13q33.1           |                 |               | 10 |                   |               |
|               |    |                   | 13q33.2           |                 |               | 17 |                   |               |
|               |    |                   | 13q34             |                 |               |    |                   |               |
|               |    |                   | 19p13.12          |                 |               |    |                   |               |
|               |    |                   | 19p13.11-19p13.12 |                 |               |    |                   |               |
| <b>PGBM27</b> | 2  | 5q12.1-5p15.33    | 2p25.1            | 10p15.1-10p15.3 |               | 3  | 1q42.2-1q43       | 5q22.3        |
|               | 7  | 9q31.3-9q21.33    | 2p24.3-2p24.2     |                 |               | 4  | 2p24.1-2p24.2     | 5q12.2-5q12.3 |
|               | 16 | 9q21.33-9q21.13   | 2p24.1            |                 |               | 6  | 2p21-2p22.3       | 17q21.32      |
|               |    | 12p               | 5q23.1            |                 |               | 8  | 5q                | 18q23         |
|               |    | 21q               | 5q22.2            |                 |               | 11 | 5q14.2-5q22.2     | 18q23         |
|               |    |                   | 7p11.2            |                 |               | 17 | 5p13.3-5p13.2     |               |
|               |    |                   | 7q21.13           |                 |               | 18 | 7q34-7q11.21      |               |
|               |    |                   | 7q21.2            |                 |               | 19 | 9q33.3-9q32       |               |
|               |    |                   | 7q33              |                 |               | X  | 9q21.13-9p24.3    |               |
|               |    |                   | 7q33              |                 |               |    | 10q25.1-10q26.2   |               |
|               |    |                   | 10p15.1           |                 |               |    | 11q13.2-11q23.1   |               |
|               |    |                   | 11q12.1-11q11     |                 |               |    | 11p15.4-11p15.5   |               |
|               |    |                   | 15q26.3           |                 |               |    | 15q               |               |
|               |    |                   | 19q13.43          |                 |               |    | 22q               |               |
| <b>PGBM31</b> |    | 3q28-3q29         | 5p15.33           |                 |               | 17 | 3p24.3-3p26.3     |               |
|               |    | 8q21.13-8q24.12   | 9p13.3            |                 |               |    | 3p14.2-3q26.31    |               |
|               |    | 9p21.3-9p24.3     | 9q21.33           |                 |               |    | 8p                |               |
|               |    | 9p21.2-9p13.3     | 18q22.2-18q22.3   |                 |               |    |                   |               |
|               |    | 9q                | 19p13.3           |                 |               |    |                   |               |
|               |    | 20q13.2-20q13.33  |                   |                 |               |    |                   |               |
|               |    | 22q11.23-22q11.21 |                   |                 |               |    |                   |               |
| <b>PGBM32</b> |    | 1q                | 6q14.1            |                 |               |    | 1p                | 6q12          |
|               |    | 6p12.3-6p25.3     | 22q11.23-22q12.1  |                 |               |    | 6q14.1-6q27       | 6q13          |
|               |    |                   |                   |                 |               |    |                   | 6q13          |
| <b>PGBM34</b> | 3  | 1q32.1-1q21.2     | 1p36.22-1p36.21   | 9p21.3-9p21.1   | 6q12          | 10 | 1p                | 19p13.3       |
|               | 4  | 1p36.21-1p33      | 1p32.2-1p32.1     |                 |               | 11 | 2q14.3-2p23.1     | 19p13.2       |
|               | 7  | 8q21.13-8q24.3    | 1p31.1            |                 |               | 12 | 2q34-2q37.3       |               |

|               |                         |                   |                   |  |                 |    |                           |                   |
|---------------|-------------------------|-------------------|-------------------|--|-----------------|----|---------------------------|-------------------|
|               |                         | 9q21.11-9q31.3    | 1p13.3            |  |                 | 17 | 3p25.3-3p26.3             |                   |
|               |                         | 19p13.2-19p12     | 19p13.3           |  |                 |    | 4q28.1-4q23.1             |                   |
|               |                         | 20p13-20q11.21    | 22q11.21-22q11.22 |  |                 |    | 5q23.1-5q35.3             |                   |
|               |                         | 20q11.22-20q13.12 | 22q11.21          |  |                 |    | 6p                        |                   |
|               |                         | 21q               | 22q11.21          |  |                 |    | 6q                        |                   |
|               |                         | 22q13.2-22q13.31  |                   |  |                 |    | 8p12-8p23.3               |                   |
|               |                         | Xp21.3-Xq27.3     |                   |  |                 |    | 9p                        |                   |
|               |                         | Xp21.3-Xp22.33    |                   |  |                 |    | 13q                       |                   |
|               |                         |                   |                   |  |                 |    | 14q                       |                   |
|               |                         |                   |                   |  |                 |    | 15q11.2-15q22.2           |                   |
|               |                         |                   |                   |  |                 |    | 15q22.2-15q26.3           |                   |
|               |                         |                   |                   |  |                 |    | 19p12-19q12               |                   |
|               |                         |                   |                   |  |                 |    | 20q13.12-20q13.2          |                   |
|               |                         |                   |                   |  |                 |    | 22q                       |                   |
|               |                         |                   |                   |  |                 |    | Xq27.3-Xq28               |                   |
| <b>PGBM35</b> |                         | 17q21.32-17q25.3  | 10q11.22          |  |                 | 9  | 22q                       |                   |
|               |                         |                   |                   |  |                 | 16 |                           |                   |
|               |                         |                   |                   |  |                 | 18 |                           |                   |
| <b>PGBM36</b> |                         |                   | 14q32.33          |  |                 |    | 22q                       | 7p22.1            |
|               |                         |                   | 18q23             |  |                 |    |                           | 7q22.1            |
| <b>PGBM37</b> |                         | 1q                |                   |  |                 |    | 2q14.1-2q31.3             | 9q34.3            |
|               |                         |                   |                   |  |                 |    | 6q12-6q27                 | 20p12.1           |
|               |                         |                   |                   |  |                 |    | 8q24.22-8q24.3            |                   |
|               |                         |                   |                   |  |                 |    | 9p21.1-9p24.3             |                   |
|               |                         |                   |                   |  |                 |    | 16q22.1-16q24.3           |                   |
| <b>PGBM39</b> | 3                       | 21q               |                   |  | 9p21.3          | 10 | 12p13.31-12p13.33         | 5p15.32-5p15.33   |
|               | 7                       |                   |                   |  | 9p21.3          | 12 | 12p12.3-12p11.23          | 5p15.2            |
|               | 19                      |                   |                   |  | 9p21.3          | 18 |                           | 5p15.1            |
|               |                         |                   |                   |  |                 |    |                           | 5p14.3            |
|               |                         |                   |                   |  |                 |    |                           | 9p23              |
|               |                         |                   |                   |  |                 |    |                           | 9p23              |
|               |                         |                   |                   |  |                 |    |                           | 9p22.3            |
|               |                         |                   |                   |  |                 |    |                           | 9p22.3-9p22.2     |
|               |                         |                   |                   |  |                 |    |                           | 9p21.2            |
|               |                         |                   |                   |  |                 |    |                           | 9p21.2-9p13.2     |
|               |                         |                   |                   |  |                 |    |                           | 12p13.31          |
|               |                         |                   |                   |  |                 |    |                           | 12p12.3           |
| <b>PGBM40</b> | <b>ZERO ALTERATIONS</b> |                   |                   |  |                 |    |                           |                   |
| <b>PGBM41</b> |                         |                   |                   |  |                 |    |                           | 8p11.22           |
| <b>PGBM42</b> |                         |                   |                   |  |                 |    | 22q11.23-22q13.33<br>(CN) |                   |
| <b>PGBM43</b> |                         | 5p14.3-5p13.3     | 4q12              |  | 4q34.3          | 1  | 2p                        | 4p12              |
|               |                         | 6q15-6p25.3       | 4q12              |  | 7p14.1          | 4  | 3q13.33-3q29              | 5p15.32-5p15.31   |
|               |                         | 9p13.3-9q34.3     | 4q12              |  | 11q22.3-11q23.1 | 7  | 5q11.2-5q21.3             | 5q31.3-5q32       |
|               |                         | 9p24.1-9p24.3     | 5p15.33           |  | 20q13.31        | 11 | 9p22.1-9p21.2             | 6q24.3            |
|               |                         | 10p12.1-10p13     | 5p15.33-5p15.32   |  |                 | 18 | 10q                       | 9p23-9p22.3       |
|               |                         |                   | 5p15.2            |  |                 |    | 12q21.2-12q23.1           | 10p11.23          |
|               |                         |                   | 5p15.1            |  |                 |    | 13q                       | 12q24.31-12q24.32 |
|               |                         |                   | 5p12              |  |                 |    | 14q                       | 16q23.2-16q23.3   |
|               |                         |                   | 7q31.2-7q31.31    |  |                 |    | 15q                       | 19p13.3           |
|               |                         |                   | 9p13.3            |  |                 |    | 16q                       |                   |
|               |                         |                   | 9p21.1            |  |                 |    | 17p                       |                   |
|               |                         |                   | 10q23.33-10q24.1  |  |                 |    | 17q11.2-17q23.2           |                   |
|               |                         |                   | 10p11.21-10p11.1  |  |                 |    | 19q                       |                   |
|               |                         |                   | 10p11.22          |  |                 |    | 20p                       |                   |
|               |                         |                   | 13q13.3           |  |                 |    | 20q                       |                   |
|               |                         |                   | 19p13.3           |  |                 |    | 22q                       |                   |
|               |                         |                   |                   |  |                 |    | Xp                        |                   |
|               |                         |                   |                   |  |                 |    | Xq11.2-Xq21.31            |                   |
| <b>PGBM45</b> |                         | 1q                | 2p24.3            |  |                 |    | 1p32.2-1p34.1             | 2p23.3-2p24.1     |
|               |                         |                   | 2p25.1            |  |                 |    |                           | 3p12.3-3p12.1     |

|  |  |        |  |  |  |  |  |                 |
|--|--|--------|--|--|--|--|--|-----------------|
|  |  | 2p25.1 |  |  |  |  |  | 6p25.2-6p25.3   |
|  |  | 2p25.3 |  |  |  |  |  | 9p23            |
|  |  | 7p11.2 |  |  |  |  |  | 10p15.1-10p14   |
|  |  | 9p24.3 |  |  |  |  |  | 12q21.1-12q21.2 |
|  |  |        |  |  |  |  |  |                 |



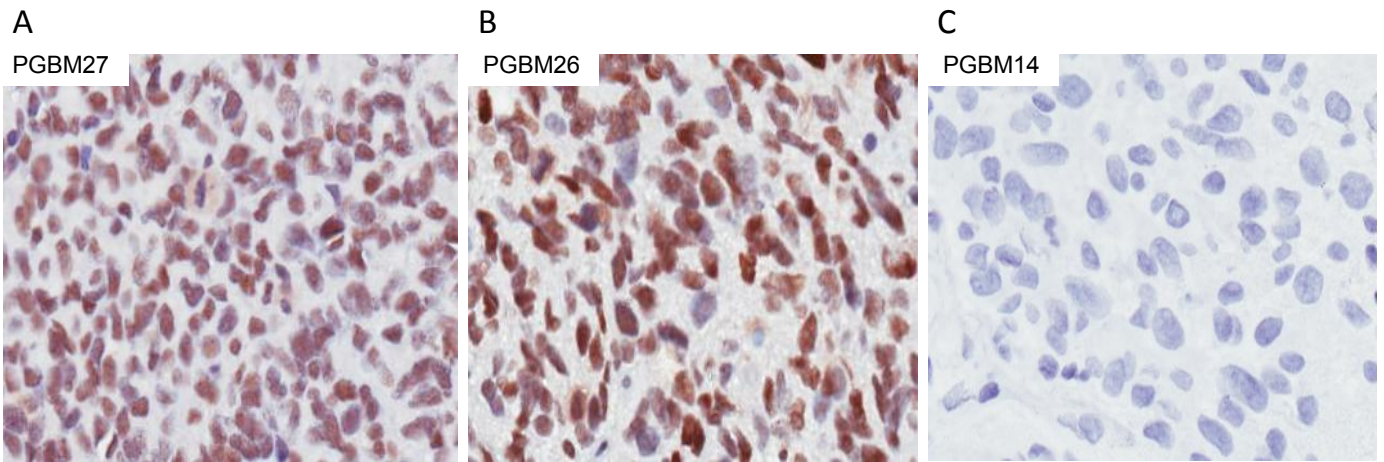

**Supplementary Figure 1:** Immunohistochemical staining for ATRX showing concordance between sequencing data and protein expression in samples. A). & B). ATRX is expressed in these two samples (PGBM27 & PGBM26) with wild type *ATRX* following whole exome sequencing. C). ATRX is not expressed in PGBM14 where mutations in *ATRX* were identified following whole exome sequencing.

| Pathway               | Gene   | Paediatric GBM |             | Adult GBM     |             | p-value <sup>†</sup> |
|-----------------------|--------|----------------|-------------|---------------|-------------|----------------------|
|                       |        | No. of tumors  | % of tumors | No. of tumors | % of tumors |                      |
| Chromatin Remodelling | H3F3A  | 32/90          | 36          | 11/318        | 3           | <0.0001              |
|                       | ATRX   | 59/190         | 31          | 23/161        | 14          | 0.0002               |
|                       | DAXX   | 2/69           | 3           | 0/217*        | 0*          | 0.0576               |
|                       | IDH1   | 8/83           | 10          | 24/221        | 11          | 0.8367               |
| Cell Signalling       | EGFR   | 2/48           | 4           | 35/221        | 16          | 0.0362               |
|                       | PDGFRA | 4/48           | 8           | 4/116         | 3           | 0.234                |
|                       | NF1    | 13/48          | 27          | 36/221        | 16          | 0.0979               |
|                       | PIK3CA | 3/48           | 6           | 16/221        | 7           | 1                    |
|                       | PIK3R1 | 5/48           | 10          | 18/221        | 8           | 0.575                |
|                       | PTEN   | 3/48           | 6           | 54/221        | 24          | 0.0034               |
| Cell Cycle            | TP53   | 26/48          | 54          | 73/221        | 33          | 0.008                |
|                       | CDKN2A | 3/48           | 6           | 0/22          | 0           | 0.5467               |
|                       | RB1    | 5/48           | 10          | 15/221        | 7           | 0.3694               |

<sup>†</sup>Fisher's two-tailed comparison test for paediatric and adult GBM.

\*105 of 217 samples were sequenced without DAXX mutation reported, 112 of 217 samples don't have DAXX mutation

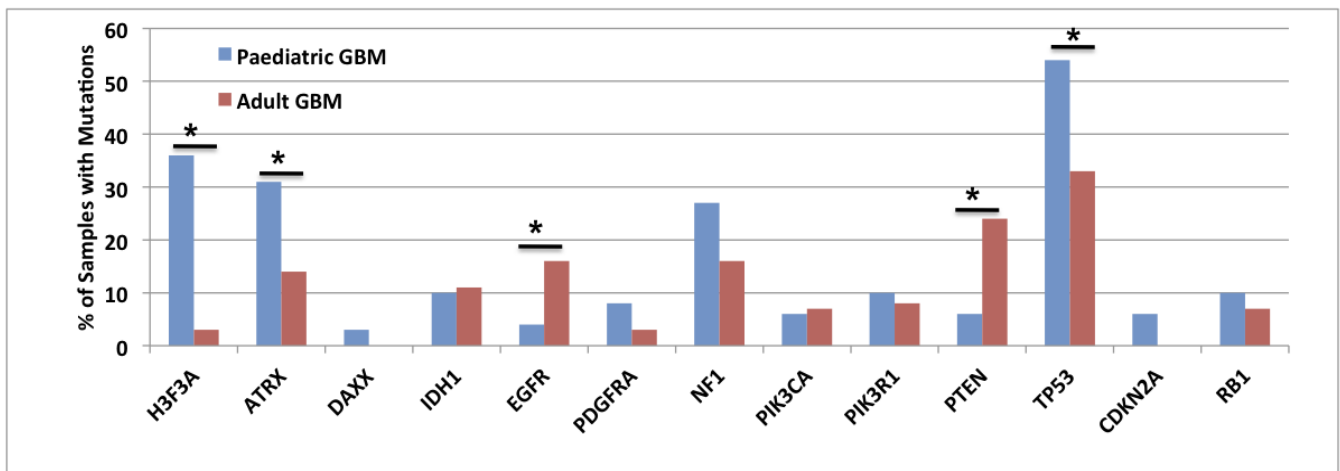

**Supplementary Figure 2a:** *ATRX* & *DAXX* mutation data for paediatric GBM were from WES, Sanger sequencing and *ATRX* IHC analysis described in this study, and Heaphy *et al*<sup>20</sup>. Other paediatric GBM results were from our study. *H3F3A* mutation data for adult GBM were obtained using Sanger sequencing. Adult GBM *ATRX* results were calculated from our study and Heaphy *et al*<sup>20</sup>. Datasets described by Verhaak *et al*<sup>18</sup>, Parsons *et al*<sup>11</sup>, and Heaphy *et al*<sup>20</sup> were used for all the other results of adult GBM.

|                       |        | Adult GBM Gene-expression based molecular subtypes |             |               |             |          |               |             |          |               |             |          |               |             |          |
|-----------------------|--------|----------------------------------------------------|-------------|---------------|-------------|----------|---------------|-------------|----------|---------------|-------------|----------|---------------|-------------|----------|
|                       |        | Paediatric GBM                                     |             | Proneural     |             |          | Neural        |             |          | Classical     |             |          | Mesenchymal   |             |          |
| Pathway               | Gene   | No. of tumors                                      | % of tumors | No. of tumors | % of tumors | p-value* | No. of tumors | % of tumors | p-value* | No. of tumors | % of tumors | p-value* | No. of tumors | % of tumors | p-value* |
| Chromatin Remodelling | H3F3A  | 32/90                                              | 36          | NA            | NA          | NA       |
|                       | ATRX   | 59/190                                             | 31          | NA            | NA          | NA       |
|                       | DAXX   | 2/69                                               | 3           | NA            | NA          | NA       |
|                       | IDH1   | 8/83                                               | 10          | 11/37         | 30          | 0.0125   | 1/19          | 5           | 1        | 0/22          | 0           | 0.1993   | 0/38          | 0           | 0.05554  |
| Cell Signalling       | EGFR   | 2/48                                               | 4           | 6/37          | 16          | 0.0734   | 5/19          | 26          | 0.0166   | 7/22          | 32          | 0.0032   | 2/38          | 5           | 1        |
|                       | PDGFRA | 4/48                                               | 8           | 4/37          | 11          | 0.7235   | 0/19          | 0           | 0.5713   | 0/22          | 0           | 0.3008   | 0/38          | 0           | 0.1264   |
|                       | NF1    | 13/48                                              | 27          | 2/37          | 5           | 0.0102   | 3/19          | 16          | 0.5259   | 1/22          | 5           | 0.0499   | 14/38         | 37          | 0.3585   |
|                       | PIK3CA | 3/48                                               | 6           | 3/37          | 8           | 1        | 1/19          | 5           | 1        | 1/22          | 5           | 1        | 1/38          | 3           | 0.6266   |
|                       | PIK3R1 | 5/48                                               | 10          | 7/37          | 19          | 0.3498   | 2/19          | 11          | 1        | 1/22          | 5           | 0.6572   | 0/38          | 0           | 0.0636   |
|                       | PTEN   | 3/48                                               | 6           | 6/37          | 16          | 0.1687   | 4/19          | 21          | 0.0937   | 5/22          | 23          | 0.098    | 12/38         | 32          | 0.0033   |
| Cell Cycle            | TP53   | 26/48                                              | 54          | 20/37         | 54          | 1        | 4/19          | 21          | 0.0162   | 0/22          | 0           | <0.0001  | 12/38         | 32          | 0.0494   |
|                       | CDKN2A | 3/48                                               | 6           | NA            | NA          | NA       |
|                       | RB1    | 5/48                                               | 10          | 1/37          | 3           | 0.2261   | 1/19          | 5           | 0.6666   | 0/22          | 0           | 0.1727   | 5/38          | 13          | 0.7442   |

\*Fisher's two tailed test to compare between pediatric GBM and different subtypes of adult GBM (Proneural, Neural, Classical, Mesenchymal).

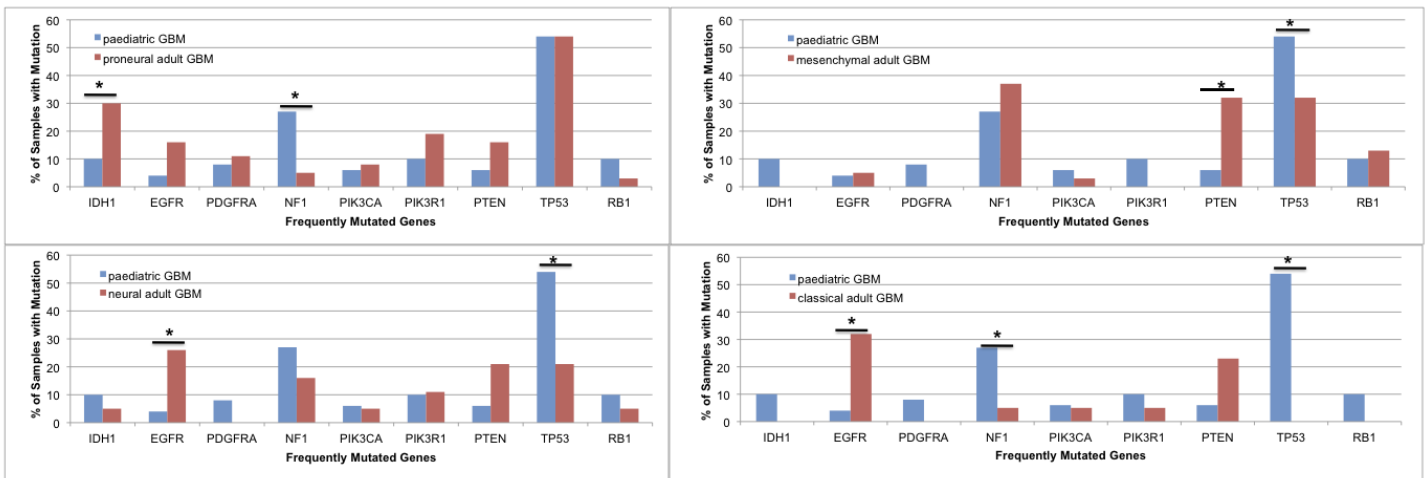

**Figure 2b: Comparison of frequently mutated genes indicates that paediatric GBM is distinct from the previously identified molecular subgroups in adult GBM<sup>18</sup>.** Dark blue indicates mutations in *H3F3A*, *ATRX* and *DAXX* we identified and specific to paediatric GBM; *IDH1* (light blue) mutations are representative of proneural subgroup of adult GBM and not paediatric GBM. Mutations in *PDGFRA* and *TP53* in children had similar rates to adult proneural GBM while *NF1* and *RB1* mutations were more similar to the mesenchymal subgroup (green). Bar graphs showed limited overlap between paediatric and adult GBM. Fisher's t-test used to compare subgroups. \*p-value<0.05. NA=not available.

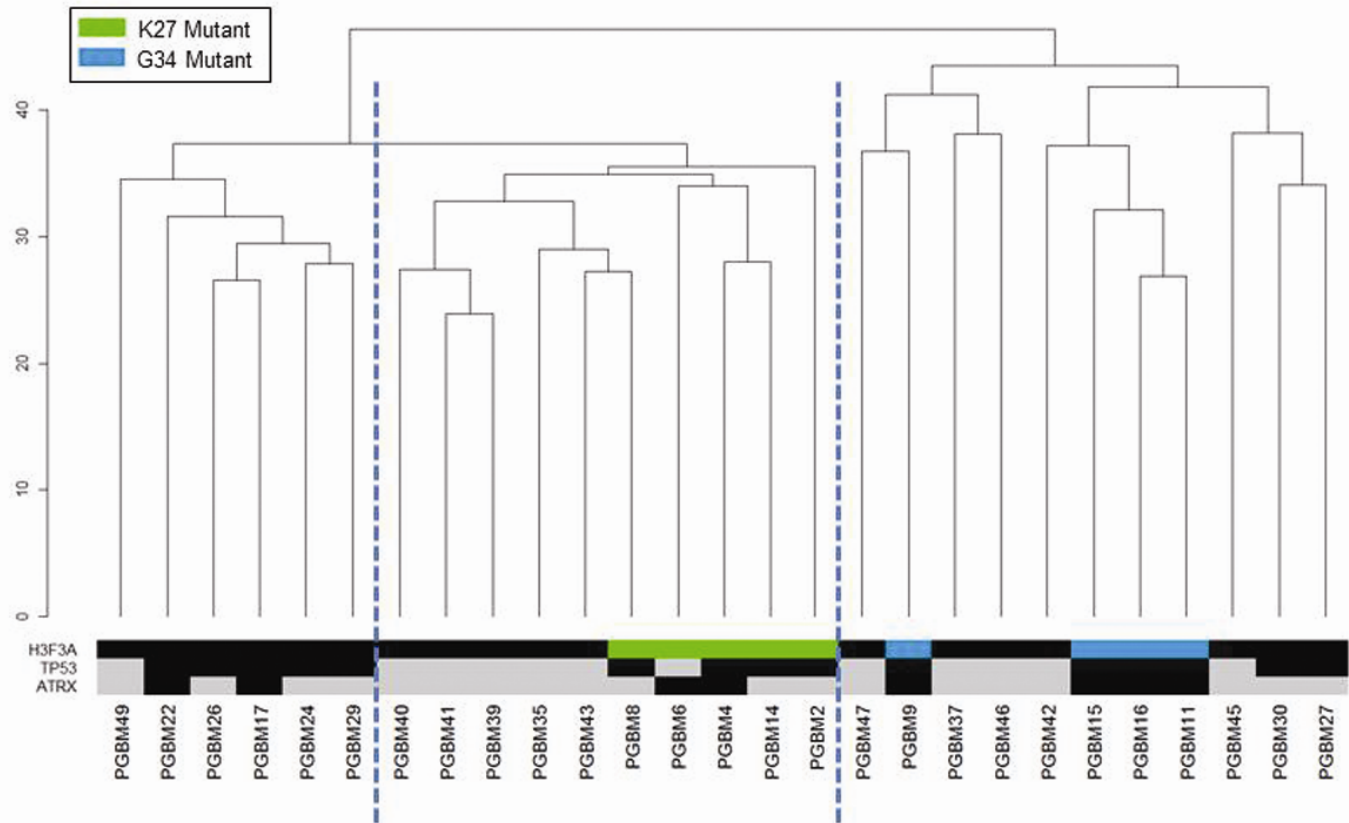

**Supplementary Figure 3:** Unsupervised clustering of the 100 genes most differentially regulated in 27 paediatric glioblastoma also analyzed by whole exome sequencing show samples with K27M H3.3 and G34V H3.3 mutations to cluster separately from each other and from samples wild type for H3.3.

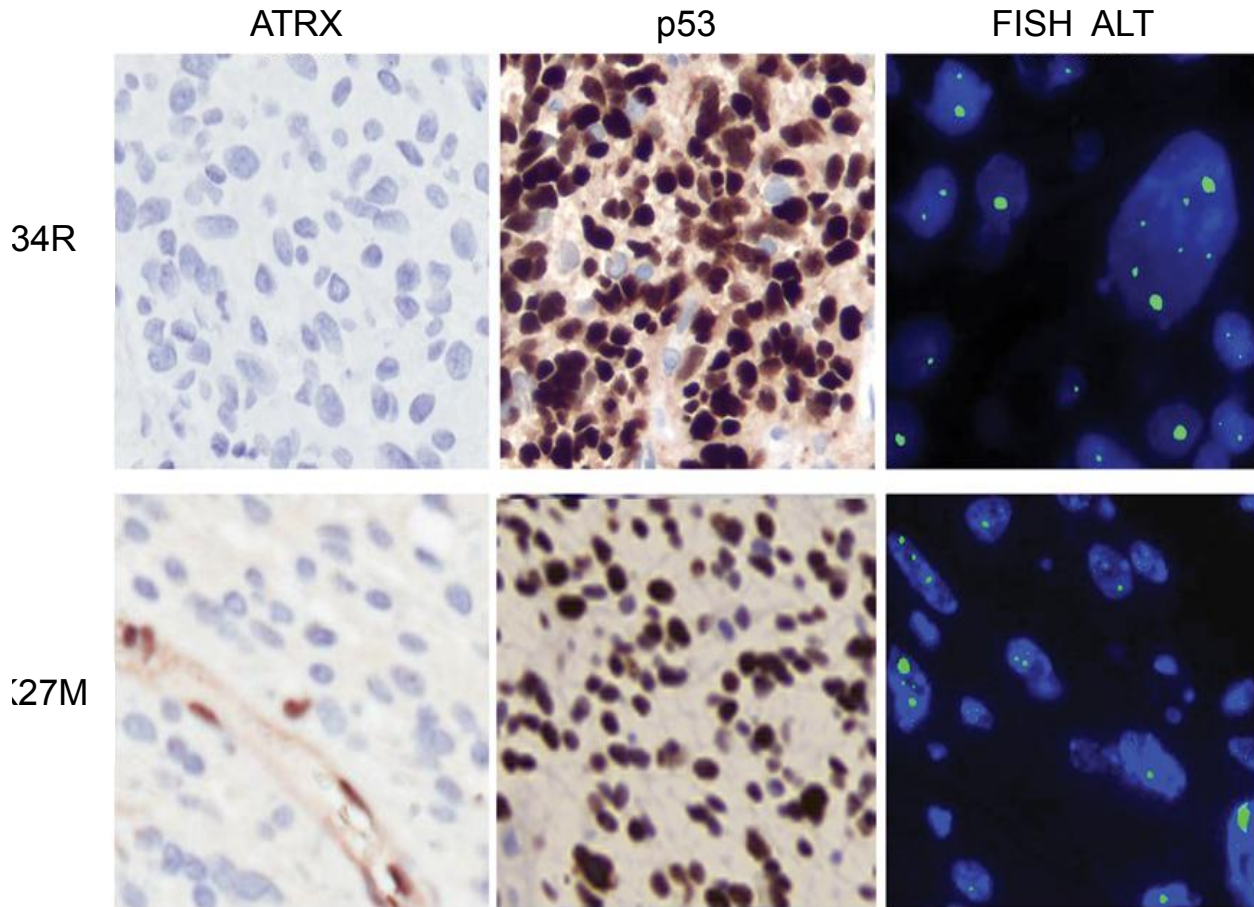

**Supplementary Figure 4:** Immunohistochemical staining for ATRX (left panel), P53 (middle panel) of consecutive slides from representative patients with G34V (upper panel) or K27H3.3 (lower panel) show homogeneous loss of ATRX and abnormal P53 across the vast majority of tumour cells. Alternative lengthening of telomeres was present in a large proportion of tumor cells as shown here by fluorescence in situ hybridization (right panel).

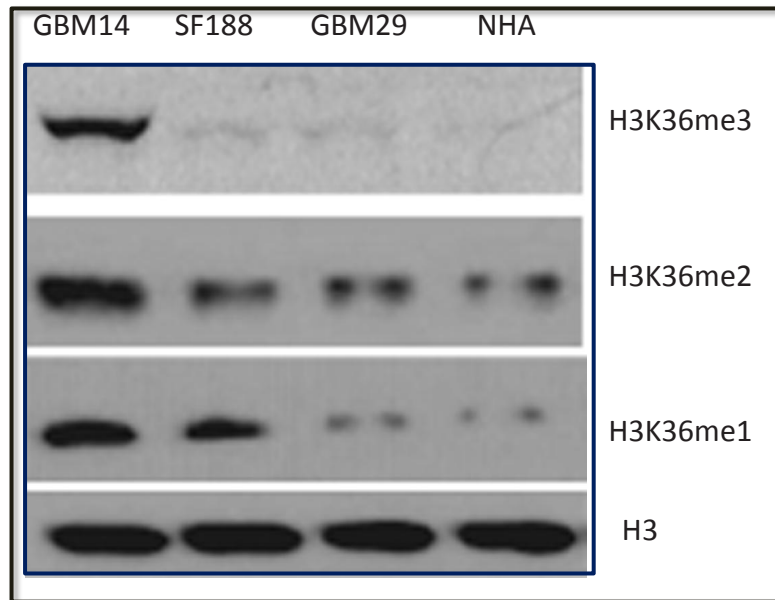

**Supplementary Figure 5:** H3.3 Lysine 36 is methylated in a G34V mutant (GBM 14). Cell lysates from GBM14, (which harbours G34V mutation), GBM29 (wild type for H3.3), a primary paediatric GBM cell line SF188 and normal human astrocytes (all wild type for H3.3) were analyzed with antibodies recognizing the three methylated forms of K36. Even though we cannot differentiate H3.3K36me3 from global H3K36me3 levels, results indicate increased methylation of K36 me1, me2 and me3 in the one sample tested carrying the G34V mutation.

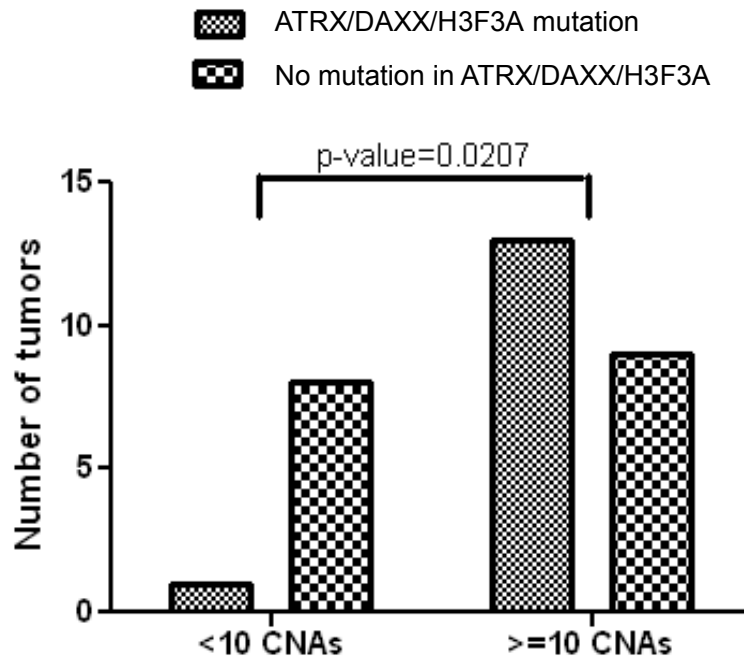

**Supplementary Figure 6:** Single nucleotide polymorphism (SNP) array profiling reveals differences in copy number aberrations (CNAs) in *ATRX*, *H3F3A* and *TP53* -mutated paediatric glioblastoma. Focal losses or gains comprising genes relevant in paediatric GBM overlapped with previous reports<sup>3,4,12</sup>. Samples were split into a group with relatively stable genomes (<10 CNAs, bland genome in<sup>12</sup>) and a group with more unstable genomes (>=10 CNAs). Samples with a mutation in at least one of *ATRX*, *H3F3A* and *TP53* were significantly associated with an unstable genome ( $p=0.0207$ , Fisher's exact test).



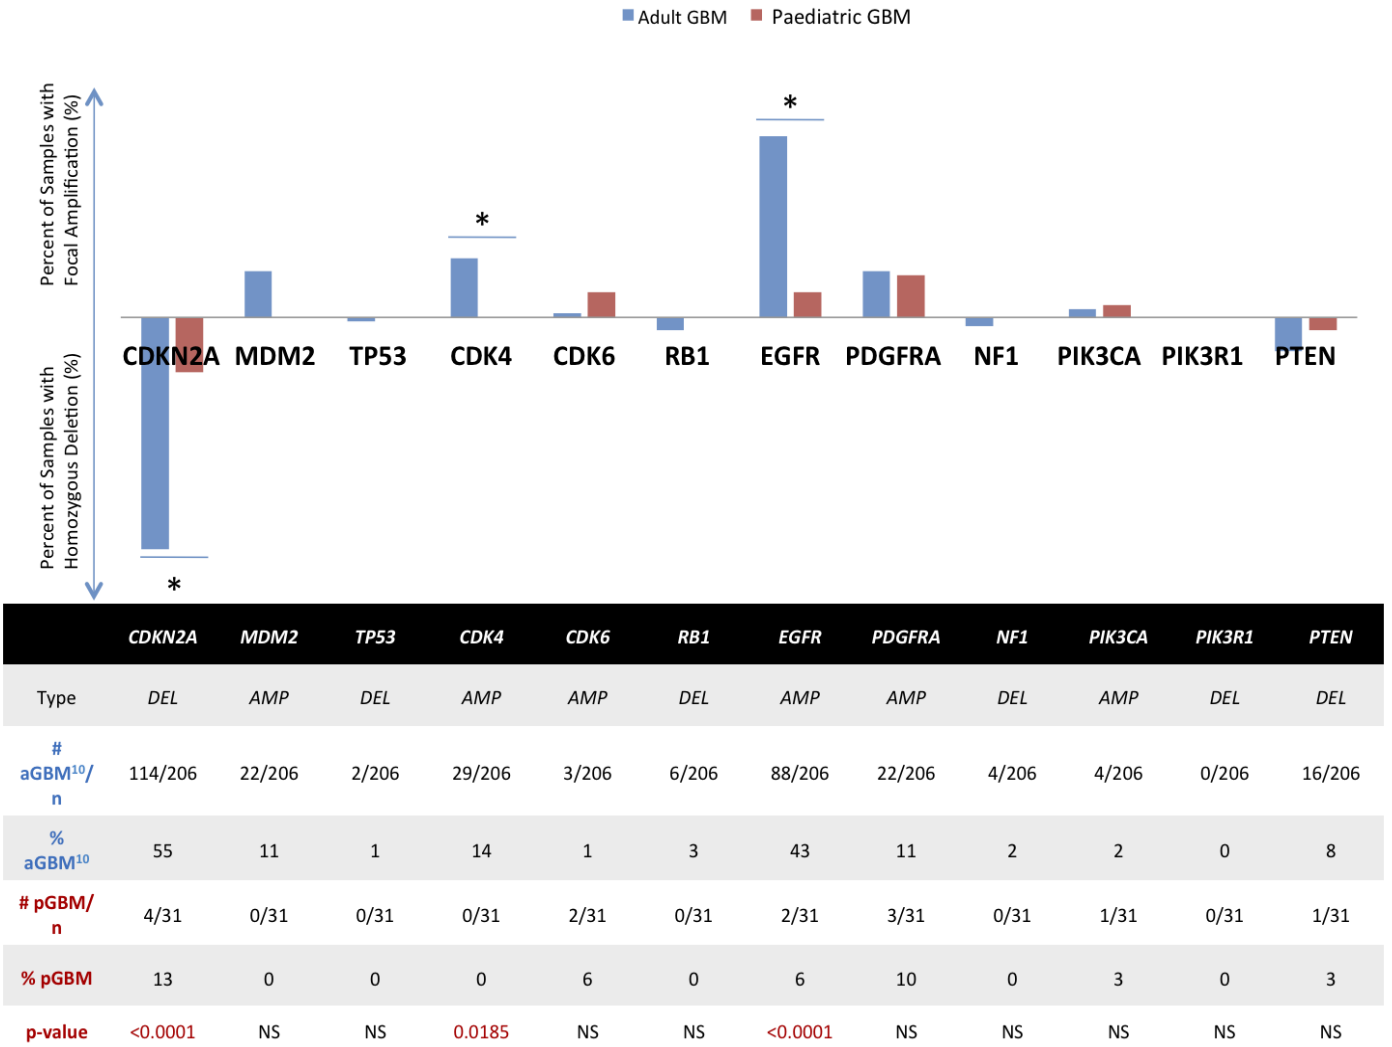

**Figure7:** Comparison of copy number alterations at important gene loci between paediatric and adult GBM.
